# Supplementary material
Source: MDPI journal article supplement (https://www.mdpi.com/2073-4395/11/8/1667)
Supplement: s1 [file s1]

Table S1

**Table S1.** List of tobacco samples included in a survey of five viruses in Poland.

Abbreviations: TSWV-tomato spotted wilt orthotospovirus, TMV-tobacco mosaic virus, CMV-cucumber mosaic virus, PVY-potato virus Y, TRSV-tobacco ringspot virus. Results of DAS-ELISA/RT-PCR tests: 1-positive result, 0-negative result.

| No. | Province code | Field | Plant no. | TSWV_ELISA | TMV_ELISA | CMV_ELISA | TRSV_ELISA | PVY_ELISA | No. of viruses detected in ELISA | Coinfection TSWV+TMV detected in ELISA? | TSWV_RT-PCR | TMV_RT-PCR | CMV_RT-PCR | TRSV_RT-PCR | PVY_RT-PCR | Comments |
|-----|---------------|-------|-----------|------------|-----------|-----------|------------|-----------|----------------------------------|-----------------------------------------|-------------|------------|------------|-------------|------------|----------|
| 1   | KP            | BC    | 1         | 0          | 0         | 0         | 0          | 0         | 0                                | no                                      |             |            |            |             |            |          |
| 2   | KP            | BC    | 2         | 0          | 0         | 0         | 0          | 0         | 0                                | no                                      |             |            |            |             |            |          |
| 3   | KP            | BC    | 3         | 0          | 0         | 0         | 0          | 0         | 0                                | no                                      |             |            |            |             |            |          |
| 4   | KP            | BC    | 4         | 0          | 0         | 0         | 0          | 0         | 0                                | no                                      |             |            |            |             |            |          |
| 5   | KP            | BC    | 5         | 0          | 0         | 0         | 0          | 0         | 0                                | no                                      |             |            |            |             |            |          |
| 6   | KP            | BC    | 6         | 0          | 0         | 0         | 0          | 0         | 0                                | no                                      |             |            |            |             |            |          |
| 7   | KP            | BC    | 7         | 0          | 0         | 0         | 0          | 0         | 0                                | no                                      |             |            |            |             |            |          |
| 8   | KP            | BC    | 8         | 0          | 0         | 0         | 0          | 0         | 0                                | no                                      |             |            |            |             |            |          |
| 9   | KP            | BC    | 9         | 0          | 0         | 0         | 0          | 0         | 0                                | no                                      |             |            |            |             |            |          |
| 10  | KP            | BC    | 10        | 0          | 0         | 0         | 0          | 0         | 0                                | no                                      |             |            |            |             |            |          |
| 11  | KP            | BC    | 11        | 0          | 0         | 0         | 0          | 0         | 0                                | no                                      |             |            |            |             |            |          |
| 12  | KP            | BC    | 12        | 0          | 0         | 0         | 0          | 0         | 0                                | no                                      |             |            |            |             |            |          |
| 13  | KP            | BC    | 13        | 0          | 0         | 0         | 0          | 0         | 0                                | no                                      |             |            |            |             |            |          |
| 14  | KP            | BC    | 14        | 0          | 0         | 0         | 0          | 0         | 0                                | no                                      |             |            |            |             |            |          |
| 15  | KP            | BC    | 15        | 0          | 0         | 0         | 0          | 0         | 0                                | no                                      |             |            |            |             |            |          |
| 16  | KP            | KR    | 1         | 0          | 0         | 0         | 0          | 0         | 0                                | no                                      |             |            |            |             |            |          |
| 17  | KP            | KR    | 2         | 0          | 0         | 0         | 0          | 0         | 0                                | no                                      |             |            |            |             |            |          |
| 18  | KP            | KR    | 3         | 0          | 0         | 0         | 0          | 0         | 0                                | no                                      |             |            |            |             |            |          |
| 19  | KP            | KR    | 4         | 0          | 0         | 0         | 0          | 0         | 0                                | no                                      |             |            |            |             |            |          |
| 20  | KP            | KR    | 5         | 0          | 0         | 0         | 0          | 0         | 0                                | no                                      |             |            |            |             |            |          |
| 21  | KP            | KR    | 6         | 0          | 0         | 0         | 0          | 0         | 0                                | no                                      |             |            |            |             |            |          |
| 22  | KP            | KR    | 7         | 0          | 0         | 0         | 1          | 0         | 1                                | no                                      |             |            |            |             |            |          |

Table S1

|    |    |     |    |   |   |   |   |   |   |     |   |   |   |   |   |                                     |
|----|----|-----|----|---|---|---|---|---|---|-----|---|---|---|---|---|-------------------------------------|
| 23 | KP | KR  | 8  | 0 | 0 | 0 | 0 | 0 | 0 | no  |   |   |   |   |   |                                     |
| 24 | KP | KR  | 9  | 0 | 0 | 0 | 0 | 0 | 0 | no  |   |   |   |   |   |                                     |
| 25 | KP | KR  | 10 | 0 | 0 | 0 | 0 | 0 | 0 | no  |   |   |   |   |   |                                     |
| 26 | KP | KR  | 11 | 0 | 0 | 0 | 0 | 0 | 0 | no  |   |   |   |   |   |                                     |
| 27 | KP | KR  | 12 | 0 | 0 | 0 | 0 | 0 | 0 | no  |   |   |   |   |   |                                     |
| 28 | KP | M1  | 1  | 0 | 0 | 0 | 0 | 0 | 0 | no  |   |   |   |   |   |                                     |
| 29 | KP | M1  | 2  | 0 | 0 | 0 | 0 | 0 | 0 | no  |   |   |   |   |   |                                     |
| 30 | KP | M1  | 3  | 0 | 0 | 0 | 0 | 0 | 0 | no  |   |   |   |   |   |                                     |
| 31 | KP | M1  | 4  | 0 | 0 | 0 | 0 | 0 | 0 | no  |   |   |   |   |   |                                     |
| 32 | KP | M1  | 5  | 0 | 0 | 0 | 0 | 0 | 0 | no  |   |   |   |   |   |                                     |
| 33 | KP | M1  | 6  | 0 | 0 | 0 | 0 | 0 | 0 | no  |   |   |   |   |   |                                     |
| 34 | KP | M1  | 7  | 0 | 0 | 0 | 0 | 0 | 0 | no  |   |   |   |   |   |                                     |
| 35 | KP | M1  | 8  | 0 | 0 | 0 | 0 | 0 | 0 | no  |   |   |   |   |   |                                     |
| 36 | KP | M1  | 9  | 0 | 0 | 0 | 0 | 0 | 0 | no  |   |   |   |   |   |                                     |
| 37 | KP | M2  | 1  | 0 | 0 | 0 | 0 | 0 | 0 | no  |   |   |   |   |   |                                     |
| 38 | KP | M2  | 2  | 0 | 0 | 0 | 0 | 0 | 0 | no  |   |   |   |   |   |                                     |
| 39 | KP | M2  | 3  | 0 | 0 | 0 | 0 | 0 | 0 | no  |   |   |   |   |   |                                     |
| 40 | KP | M2  | 4  | 0 | 0 | 0 | 0 | 0 | 0 | no  |   |   |   |   |   |                                     |
| 41 | KP | M2  | 5  | 0 | 0 | 0 | 0 | 0 | 0 | no  |   |   |   |   |   |                                     |
| 42 | KP | M3  | 1  | 1 | 1 | 1 | 0 | 0 | 3 | yes |   |   |   |   |   |                                     |
| 43 | KP | M3  | 2  | 0 | 0 | 1 | 0 | 0 | 1 | no  |   |   |   |   |   |                                     |
| 44 | KP | M3  | 3  | 0 | 0 | 0 | 0 | 0 | 0 | no  |   |   |   |   |   |                                     |
| 45 | KP | M4  | 1  | 0 | 0 | 0 | 0 | 0 | 0 | no  |   |   |   |   |   |                                     |
| 46 | KP | M4  | 2  | 0 | 0 | 1 | 0 | 1 | 2 | no  |   |   |   |   |   |                                     |
| 47 | KP | M4  | 3  | 0 | 1 | 0 | 1 | 1 | 3 | no  |   |   |   |   |   |                                     |
| 48 | KP | M4  | 4  | 1 | 1 | 0 | 0 | 0 | 2 | yes |   |   |   |   |   |                                     |
| 49 | DS | BG1 | 1  | 1 | 0 | 0 | 0 | 0 | 1 | no  | 1 | 0 | 0 | 0 | 0 | suitable for TSWV inoculation tests |
| 50 | DS | BG1 | 2  | 1 | 0 | 0 | 0 | 0 | 1 | no  |   |   |   |   |   |                                     |
| 51 | DS | BG1 | 3  | 1 | 0 | 0 | 0 | 0 | 1 | no  | 1 | 0 | 0 | 0 | 0 | suitable for TSWV inoculation tests |
| 52 | DS | BG1 | 4  | 1 | 0 | 0 | 0 | 0 | 1 | no  |   |   |   |   |   |                                     |
| 53 | DS | BG2 | 1  | 1 | 0 | 0 | 0 | 0 | 1 | no  | 1 | 0 | 0 | 0 | 0 | suitable for TSWV inoculation tests |
| 54 | DS | BG2 | 2  | 1 | 0 | 0 | 0 | 0 | 1 | no  |   |   |   |   |   |                                     |
| 55 | DS | CE  | 1  | 1 | 0 | 0 | 0 | 1 | 2 | no  | 1 | 0 | 0 | 0 | 0 | PVY+ in ELISA, PVY-in RT-PCR        |

Table S1

|    |           |    |   |   |   |   |   |   |   |     |   |   |   |   |   |                                     |
|----|-----------|----|---|---|---|---|---|---|---|-----|---|---|---|---|---|-------------------------------------|
| 56 | <b>DS</b> | CE | 2 | 1 | 0 | 0 | 0 | 0 | 1 | no  | 1 | 0 | 0 | 0 | 0 | suitable for TSWV inoculation tests |
| 57 | <b>DS</b> | CE | 3 | 1 | 0 | 0 | 0 | 0 | 1 | no  | 1 | 0 | 0 | 0 | 0 | suitable for TSWV inoculation tests |
| 58 | <b>DS</b> | CE | 4 | 1 | 0 | 0 | 0 | 0 | 1 | no  | 1 | 0 | 0 | 0 | 0 | suitable for TSWV inoculation tests |
| 59 | <b>DS</b> | CE | 5 | 1 | 0 | 0 | 0 | 0 | 1 | no  | 1 | 0 | 0 | 0 | 0 | suitable for TSWV inoculation tests |
| 60 | <b>DS</b> | CE | 6 | 1 | 0 | 0 | 0 | 0 | 1 | no  | 1 | 0 | 0 | 0 | 0 | suitable for TSWV inoculation tests |
| 61 | <b>DS</b> | CE | 7 | 1 | 0 | 0 | 0 | 0 | 1 | no  | 1 | 0 | 0 | 0 | 0 | suitable for TSWV inoculation tests |
| 62 | <b>DS</b> | SK | 1 | 1 | 0 | 0 | 0 | 0 | 1 | no  | 1 | 1 | 0 | 0 | 0 | TMV- in ELISA, TMV+ in RT-PCR       |
| 63 | <b>DS</b> | SK | 2 | 1 | 0 | 0 | 0 | 0 | 1 | no  |   |   |   |   |   |                                     |
| 64 | <b>DS</b> | SK | 3 | 1 | 0 | 0 | 0 | 0 | 1 | no  | 1 | 0 | 0 | 0 | 0 | suitable for TSWV inoculation tests |
| 65 | <b>DS</b> | SK | 4 | 1 | 0 | 0 | 0 | 0 | 1 | no  |   |   |   |   |   |                                     |
| 66 | <b>DS</b> | SK | 5 | 1 | 0 | 0 | 0 | 0 | 1 | no  |   |   |   |   |   |                                     |
| 67 | <b>DS</b> | SK | 6 | 1 | 0 | 0 | 0 | 0 | 1 | no  |   |   |   |   |   |                                     |
| 68 | <b>DS</b> | SK | 7 | 1 | 0 | 0 | 0 | 0 | 1 | no  |   |   |   |   |   |                                     |
| 69 | <b>DS</b> | SK | 8 | 1 | 0 | 0 | 0 | 1 | 2 | no  |   |   |   |   |   |                                     |
| 70 | <b>DS</b> | SM | 1 | 1 | 0 | 0 | 0 | 0 | 1 | no  |   |   |   |   |   |                                     |
| 71 | <b>DS</b> | SM | 2 | 1 | 0 | 0 | 0 | 0 | 1 | no  | 1 | 0 | 0 | 0 | 0 | suitable for TSWV inoculation tests |
| 72 | <b>SK</b> | LY | 1 | 1 | 0 | 0 | 0 | 0 | 1 | no  | 1 | 1 | 0 | 0 | 0 | TMV- in ELISA, TMV+ in RT-PCR       |
| 73 | <b>SK</b> | LY | 2 | 1 | 1 | 0 | 0 | 0 | 2 | yes | 1 | 1 | 0 | 0 | 0 |                                     |
| 74 | <b>SK</b> | LY | 3 | 1 | 1 | 0 | 0 | 0 | 2 | yes |   |   |   |   |   |                                     |
| 75 | <b>SK</b> | LY | 4 | 1 | 1 | 0 | 0 | 0 | 2 | yes |   |   |   |   |   |                                     |
| 76 | <b>SK</b> | LY | 5 | 1 | 1 | 0 | 0 | 0 | 2 | yes |   |   |   |   |   |                                     |
| 77 | <b>SK</b> | LY | 6 | 1 | 1 | 0 | 0 | 0 | 2 | yes | 1 | 1 | 0 | 0 | 0 |                                     |
| 78 | <b>SK</b> | LY | 7 | 1 | 1 | 0 | 0 | 0 | 2 | yes |   |   |   |   |   |                                     |
| 79 | <b>SK</b> | ME | 1 | 1 | 0 | 0 | 0 | 0 | 1 | no  | 1 | 0 | 0 | 0 | 0 | suitable for TSWV inoculation tests |
| 80 | <b>SK</b> | ME | 2 | 1 | 0 | 0 | 0 | 0 | 1 | no  |   |   |   |   |   |                                     |
| 81 | <b>SK</b> | ME | 3 | 1 | 0 | 0 | 0 | 0 | 1 | no  | 1 | 0 | 0 | 0 | 0 | suitable for TSWV inoculation tests |
| 82 | <b>SK</b> | ME | 4 | 1 | 0 | 0 | 0 | 0 | 1 | no  |   |   |   |   |   |                                     |
| 83 | <b>SK</b> | ME | 5 | 1 | 0 | 0 | 0 | 0 | 1 | no  | 1 | 0 | 0 | 0 | 0 | suitable for TSWV inoculation tests |
| 84 | <b>SK</b> | ME | 6 | 1 | 0 | 0 | 0 | 0 | 1 | no  |   |   |   |   |   |                                     |
| 85 | <b>SK</b> | WL | 1 | 1 | 0 | 0 | 0 | 0 | 1 | no  | 1 | 1 | 0 | 0 | 0 | TMV- in ELISA, TMV+ in RT-PCR       |
| 86 | <b>SK</b> | WL | 2 | 1 | 0 | 0 | 0 | 0 | 1 | no  |   |   |   |   |   |                                     |
| 87 | <b>SK</b> | WL | 3 | 1 | 0 | 0 | 0 | 0 | 1 | no  | 1 | 0 | 0 | 0 | 0 | suitable for TSWV inoculation tests |
| 88 | <b>SK</b> | WL | 4 | 1 | 1 | 0 | 0 | 0 | 2 | yes |   |   |   |   |   |                                     |

Table S1

|     |    |    |    |   |   |   |   |   |   |     |   |   |   |   |   |                               |
|-----|----|----|----|---|---|---|---|---|---|-----|---|---|---|---|---|-------------------------------|
| 89  | SK | WL | 5  | 1 | 0 | 0 | 0 | 0 | 1 | no  |   |   |   |   |   |                               |
| 90  | SK | WL | 6  | 1 | 0 | 0 | 0 | 0 | 1 | no  | 1 | 1 | 0 | 0 | 0 | TMV- in ELISA, TMV+ in RT-PCR |
| 91  | LU | B  | 1  | 1 | 1 | 0 | 0 | 0 | 2 | yes |   |   |   |   |   |                               |
| 92  | LU | B  | 2  | 0 | 1 | 0 | 0 | 0 | 1 | no  |   |   |   |   |   |                               |
| 93  | LU | C  | 1  | 0 | 1 | 0 | 0 | 0 | 1 | no  |   |   |   |   |   |                               |
| 94  | LU | C  | 2  | 0 | 1 | 0 | 0 | 0 | 1 | no  |   |   |   |   |   |                               |
| 95  | LU | C  | 3  | 0 | 1 | 0 | 0 | 0 | 1 | no  |   |   |   |   |   |                               |
| 96  | LU | C  | 4  | 0 | 1 | 0 | 0 | 0 | 1 | no  |   |   |   |   |   |                               |
| 97  | LU | C  | 5  | 0 | 1 | 0 | 0 | 1 | 2 | no  |   |   |   |   |   |                               |
| 98  | LU | C  | 6  | 0 | 1 | 0 | 0 | 0 | 1 | no  |   |   |   |   |   |                               |
| 99  | LU | C  | 7  | 1 | 1 | 0 | 0 | 0 | 2 | yes |   |   |   |   |   |                               |
| 100 | LU | C  | 8  | 0 | 1 | 0 | 0 | 0 | 1 | no  |   |   |   |   |   |                               |
| 101 | LU | C  | 9  | 0 | 1 | 0 | 0 | 0 | 1 | no  |   |   |   |   |   |                               |
| 102 | LU | C  | 10 | 1 | 1 | 0 | 0 | 0 | 2 | yes |   |   |   |   |   |                               |
| 103 | LU | C  | 11 | 1 | 1 | 0 | 0 | 0 | 2 | yes |   |   |   |   |   |                               |
| 104 | LU | C  | 12 | 0 | 1 | 0 | 0 | 0 | 1 | no  |   |   |   |   |   |                               |
| 105 | LU | C  | 13 | 0 | 1 | 0 | 0 | 0 | 1 | no  |   |   |   |   |   |                               |
| 106 | LU | C  | 14 | 0 | 1 | 0 | 0 | 0 | 1 | no  |   |   |   |   |   |                               |
| 107 | LU | D  | 1  | 1 | 1 | 0 | 0 | 0 | 2 | yes | 1 | 1 | 0 | 0 | 0 |                               |
| 108 | LU | D  | 2  | 1 | 1 | 0 | 0 | 0 | 2 | yes |   |   |   |   |   |                               |
| 109 | LU | D  | 3  | 1 | 1 | 0 | 0 | 0 | 2 | yes |   |   |   |   |   |                               |
| 110 | LU | D  | 4  | 1 | 1 | 0 | 0 | 0 | 2 | yes |   |   |   |   |   |                               |
| 111 | LU | D  | 5  | 1 | 1 | 0 | 0 | 0 | 2 | yes | 1 | 1 | 0 | 0 | 0 |                               |
| 112 | LU | D  | 6  | 1 | 1 | 0 | 0 | 0 | 2 | yes |   |   |   |   |   |                               |
| 113 | LU | D  | 7  | 1 | 1 | 0 | 0 | 0 | 2 | yes |   |   |   |   |   |                               |
| 114 | LU | D  | 8  | 1 | 1 | 0 | 0 | 1 | 3 | yes | 1 | 1 | 0 | 0 | 0 | PVY+ in ELISA, PVY-in RT-PCR  |
| 115 | LU | K  | 1  | 0 | 1 | 0 | 0 | 0 | 1 | no  |   |   |   |   |   |                               |
| 116 | LU | K  | 2  | 0 | 1 | 0 | 0 | 0 | 1 | no  |   |   |   |   |   |                               |
| 117 | LU | K  | 3  | 0 | 1 | 1 | 0 | 1 | 3 | no  | 0 | 1 | 1 | 0 | 1 |                               |
| 118 | LU | K  | 4  | 0 | 1 | 1 | 0 | 0 | 2 | no  |   |   |   |   |   |                               |
| 119 | LU | K  | 5  | 0 | 1 | 1 | 0 | 0 | 2 | no  |   |   |   |   |   |                               |
| 120 | LU | K  | 6  | 0 | 1 | 0 | 0 | 0 | 1 | no  |   |   |   |   |   |                               |
| 121 | LU | K  | 7  | 0 | 1 | 0 | 0 | 0 | 1 | no  |   |   |   |   |   |                               |

Table S1

|     |    |     |   |   |   |   |   |   |   |     |   |   |   |   |   |                                 |  |
|-----|----|-----|---|---|---|---|---|---|---|-----|---|---|---|---|---|---------------------------------|--|
| 122 | LU | K   | 8 | 0 | 1 | 0 | 0 | 0 | 1 | no  |   |   |   |   |   |                                 |  |
| 123 | LU | NA1 | 1 | 1 | 0 | 0 | 0 | 0 | 1 | no  | 1 | 1 | 0 | 0 | 0 | TMV- in ELISA, TMV+ in RT-PCR   |  |
| 124 | LU | NA1 | 2 | 1 | 0 | 0 | 0 | 1 | 2 | no  |   |   |   |   |   |                                 |  |
| 125 | LU | NA1 | 3 | 1 | 0 | 0 | 0 | 0 | 1 | no  |   |   |   |   |   |                                 |  |
| 126 | LU | NA1 | 4 | 1 | 1 | 0 | 0 | 0 | 2 | yes | 1 | 1 | 0 | 0 | 0 | TSWV+ in ELISA, TSWV- in RT-PCR |  |
| 127 | LU | NA1 | 5 | 1 | 1 | 0 | 0 | 0 | 2 | yes | 1 | 1 | 0 | 0 | 0 |                                 |  |
| 128 | LU | NA1 | 6 | 1 | 1 | 0 | 0 | 0 | 2 | yes | 0 | 1 | 0 | 0 | 0 |                                 |  |
| 129 | LU | NA1 | 7 | 1 | 1 | 0 | 0 | 0 | 2 | yes | 1 | 1 | 0 | 0 | 0 |                                 |  |
| 130 | LU | NA2 | 1 | 1 | 1 | 0 | 0 | 0 | 2 | yes | 1 | 1 | 0 | 0 | 0 |                                 |  |
| 131 | LU | NA2 | 2 | 1 | 1 | 0 | 0 | 0 | 2 | yes |   |   |   |   |   |                                 |  |
| 132 | LU | NA2 | 3 | 1 | 1 | 0 | 0 | 0 | 2 | yes | 1 | 1 | 0 | 0 | 0 |                                 |  |
| 133 | LU | NA2 | 4 | 1 | 1 | 0 | 0 | 0 | 2 | yes | 1 | 1 | 0 | 0 | 0 |                                 |  |
| 134 | LU | NA2 | 5 | 1 | 1 | 0 | 0 | 0 | 2 | yes |   |   |   |   |   |                                 |  |
| 135 | LU | NA2 | 6 | 1 | 1 | 0 | 0 | 0 | 2 | yes |   |   |   |   |   |                                 |  |
| 136 | LU | NE  | 1 | 1 | 1 | 0 | 0 | 0 | 2 | yes | 1 | 1 | 0 | 0 | 0 |                                 |  |
| 137 | LU | NE  | 2 | 1 | 1 | 0 | 0 | 0 | 2 | yes | 1 | 1 | 0 | 0 | 0 |                                 |  |
| 138 | LU | NE  | 3 | 1 | 1 | 0 | 0 | 0 | 2 | yes | 1 | 1 | 0 | 0 | 0 |                                 |  |
| 139 | LU | NE  | 4 | 1 | 1 | 0 | 0 | 0 | 2 | yes |   |   |   |   |   |                                 |  |
| 140 | LU | NE  | 5 | 1 | 1 | 0 | 0 | 0 | 2 | yes | 1 | 1 | 0 | 0 | 0 |                                 |  |
| 141 | LU | NE  | 6 | 1 | 1 | 0 | 0 | 0 | 2 | yes |   |   |   |   |   |                                 |  |
| 142 | LU | PM  | 1 | 1 | 1 | 0 | 0 | 0 | 2 | yes |   |   |   |   |   |                                 |  |
| 143 | LU | PM  | 2 | 1 | 1 | 0 | 0 | 0 | 2 | yes |   |   |   |   |   |                                 |  |
| 144 | LU | PM  | 3 | 1 | 1 | 0 | 0 | 0 | 2 | yes |   |   |   |   |   |                                 |  |
| 145 | LU | PM  | 4 | 1 | 0 | 0 | 0 | 0 | 1 | no  |   |   |   |   |   |                                 |  |
| 146 | LU | PM  | 5 | 0 | 1 | 0 | 0 | 0 | 1 | no  |   |   |   |   |   |                                 |  |
| 147 | LU | PM  | 6 | 1 | 0 | 0 | 0 | 0 | 1 | no  |   |   |   |   |   |                                 |  |
| 148 | LU | S   | 1 | 1 | 1 | 0 | 0 | 0 | 2 | yes |   |   |   |   |   |                                 |  |
| 149 | LU | S   | 2 | 0 | 1 | 0 | 0 | 0 | 1 | no  |   |   |   |   |   |                                 |  |
| 150 | LU | S   | 3 | 0 | 1 | 0 | 0 | 0 | 1 | no  |   |   |   |   |   |                                 |  |
| 151 | LU | S   | 4 | 1 | 1 | 0 | 0 | 0 | 2 | yes |   |   |   |   |   |                                 |  |
| 152 | LU | S   | 5 | 1 | 1 | 0 | 0 | 0 | 2 | yes |   |   |   |   |   |                                 |  |
| 153 | LU | SU  | 1 | 1 | 0 | 0 | 0 | 0 | 1 | no  | 1 | 1 | 0 | 0 | 0 | TMV- in ELISA, TMV+ in RT-PCR   |  |
| 154 | LU | SU  | 2 | 1 | 0 | 0 | 0 | 1 | 2 | no  | 1 | 0 | 0 | 0 | 1 |                                 |  |

Table S1

|     |    |    |   |   |   |   |   |   |   |    |   |   |   |   |   |                                     |
|-----|----|----|---|---|---|---|---|---|---|----|---|---|---|---|---|-------------------------------------|
| 155 | LU | SU | 3 | 1 | 0 | 0 | 0 | 1 | 2 | no | 1 | 0 | 0 | 0 | 1 |                                     |
| 156 | LU | SU | 4 | 1 | 0 | 0 | 0 | 0 | 1 | no | 1 | 0 | 0 | 0 | 0 | suitable for TSWV inoculation tests |
| 157 | LU | SU | 5 | 1 | 0 | 0 | 0 | 0 | 1 | no | 1 | 0 | 0 | 0 | 0 | suitable for TSWV inoculation tests |
