# Supplementary material
Source: MDPI journal article supplement (https://www.mdpi.com/2073-4395/11/8/1667)
Supplement: s1 [file s1]

Table S2

**Table S2.** List of weeds included in a survey of five viruses in Poland.

Abbreviations: TSWV-tomato spotted wilt orthotospovirus, TMV-tobacco mosaic virus, CMV-cucumber mosaic virus, PVY-potato virus Y, TRSV-tobacco ringspot virus. Life cycle: A-annual, P-species with longer (>1year) or variable length of life cycle. Results of DAS-ELISA tests: 1-positive result, 0-negative result.

| No. | Province code | Field | Plant no. | Species                                                         | Life cycle | Family          | TSWV_ELISA | TMV_ELISA | CMV_ELISA | TRSV_ELISA | PVY_ELISA | No. of viruses detected in ELISA | Coinfection TSWV+TMV detected? |
|-----|---------------|-------|-----------|-----------------------------------------------------------------|------------|-----------------|------------|-----------|-----------|------------|-----------|----------------------------------|--------------------------------|
| 1   | ZP            | DO    | 1         | <i>Galinsoga parviflora</i> Cav.                                | A          | Asteraceae      | 0          | 0         | 0         | 0          | 0         | 0                                | no                             |
| 2   | ZP            | DO    | 2         | <i>Stellaria media</i> (L.) Vill.                               | A          | Caryophyllaceae | 0          | 0         | 0         | 0          | 0         | 0                                | no                             |
| 3   | ZP            | DO    | 3         | <i>Oxalis fontana</i> Bunge                                     | P          | Oxalidaceae     | 0          | 0         | 0         | 0          | 0         | 0                                | no                             |
| 4   | ZP            | DO    | 4         | <i>Poa annua</i> L.                                             | A          | Poaceae         | 0          | 0         | 0         | 0          | 0         | 0                                | no                             |
| 5   | ZP            | DO    | 5         | <i>Sonchus oleraceus</i> L.                                     | A          | Asteraceae      | 1          | 1         | 1         | 1          | 1         | 5                                | yes                            |
| 6   | ZP            | DO    | 6         | <i>Knautia arvensis</i> (L.) J.M. Coult.                        | P          | Dipsacaceae     | 0          | 0         | 0         | 0          | 0         | 0                                | no                             |
| 7   | ZP            | DO    | 7         | <i>Poa annua</i> L.                                             | A          | Poaceae         | 0          | 0         | 0         | 0          | 0         | 0                                | no                             |
| 8   | ZP            | DO    | 8         | <i>Veronica arvensis</i> L.                                     | A          | Plantaginaceae  | 0          | 0         | 0         | 0          | 0         | 0                                | no                             |
| 9   | ZP            | DO    | 9         | <i>Rumex acetosella</i> L.                                      | P          | Polygonaceae    | 0          | 0         | 0         | 0          | 0         | 0                                | no                             |
| 10  | ZP            | DO    | 10        | <i>Artemisia vulgaris</i> L.                                    | P          | Asteraceae      | 0          | 0         | 0         | 0          | 0         | 0                                | no                             |
| 11  | ZP            | DO    | 11        | <i>Artemisia vulgaris</i> L.                                    | P          | Asteraceae      | 0          | 0         | 0         | 0          | 0         | 0                                | no                             |
| 12  | ZP            | DO    | 12        | <i>Heracleum sphondylium</i> L.                                 | P          | Apiaceae        | 0          | 0         | 0         | 0          | 0         | 0                                | no                             |
| 13  | ZP            | DO    | 13        | <i>Galinsoga parviflora</i> Cav.                                | A          | Asteraceae      | 0          | 0         | 0         | 0          | 0         | 0                                | no                             |
| 14  | ZP            | DO    | 14        | <i>Capsella bursa-pastoris</i> (L.) Medik                       | A          | Brassicaceae    | 0          | 0         | 0         | 0          | 0         | 0                                | no                             |
| 15  | ZP            | DO    | 15        | <i>Echinochloa crus-gali</i> (L.) P. Beauv.                     | A          | Poaceae         | 0          | 0         | 0         | 0          | 0         | 0                                | no                             |
| 16  | ZP            | DO    | 16        | <i>Matricaria maritima</i> L. subsp. <i>inodora</i> (L.) Dostal | P          | Asteraceae      | 0          | 0         | 0         | 0          | 0         | 0                                | no                             |
| 17  | ZP            | DO    | 17        | <i>Oxalis fontana</i> Bunge                                     | P          | Oxalidaceae     | 0          | 0         | 0         | 0          | 0         | 0                                | no                             |
| 18  | ZP            | DO    | 18        | <i>Stellaria media</i> (L.) Vill.                               | A          | Caryophyllaceae | 0          | 0         | 0         | 0          | 0         | 0                                | no                             |
| 19  | ZP            | DO    | 19        | <i>Artemisia vulgaris</i> L.                                    | P          | Asteraceae      | 0          | 0         | 0         | 0          | 0         | 0                                | no                             |
| 20  | ZP            | DO    | 20        | <i>Cerastium holosteoides</i> Fr. Emed. Hyl.                    | P          | Caryophyllaceae | 0          | 0         | 0         | 0          | 0         | 0                                | no                             |
| 21  | ZP            | DO    | 21        | <i>Poa annua</i> L.                                             | A          | Poaceae         | 0          | 0         | 0         | 0          | 0         | 0                                | no                             |
| 22  | ZP            | DO    | 22        | <i>Sinapis arvensis</i> L.                                      | A          | Brassicaceae    | 1          | 1         | 1         | 1          | 0         | 4                                | yes                            |
| 23  | ZP            | DO    | 23        | <i>Artemisia vulgaris</i> L.                                    | P          | Asteraceae      | 0          | 0         | 0         | 0          | 0         | 0                                | no                             |
| 24  | ZP            | DO    | 24        | <i>Ballota nigra</i> L.                                         | P          | Lamiaceae       | 0          | 0         | 0         | 0          | 0         | 0                                | no                             |

Table S2

|    |    |    |    |                                                                 |   |                |   |   |   |   |   |   |    |
|----|----|----|----|-----------------------------------------------------------------|---|----------------|---|---|---|---|---|---|----|
| 25 | ZP | DO | 25 | <i>Urtica dioica</i> L.                                         | P | Urticaceae     | 0 | 0 | 0 | 0 | 0 | 0 | no |
| 26 | ZP | DO | 26 | <i>Rosa</i> sp.                                                 | P | Rosaceae       | 0 | 0 | 0 | 0 | 0 | 0 | no |
| 27 | ZP | DO | 27 | <i>Solidago virgaurea</i> L. s. str.                            | P | Asteraceae     | 0 | 0 | 0 | 0 | 0 | 0 | no |
| 28 | ZP | DO | 28 | <i>Urtica dioica</i> L.                                         | P | Urticaceae     | 0 | 0 | 0 | 0 | 0 | 0 | no |
| 29 | ZP | DO | 29 | <i>Artemisia vulgaris</i> L.                                    | P | Asteraceae     | 0 | 0 | 0 | 0 | 0 | 0 | no |
| 30 | ZP | DO | 30 | <i>Veronica chamaedrys</i> L.                                   | P | Plantaginaceae | 0 | 0 | 0 | 0 | 0 | 0 | no |
| 31 | ZP | DO | 31 | <i>Teraxacum officinale</i> F.H. Wigg.                          | P | Asteraceae     | 1 | 0 | 0 | 0 | 0 | 1 | no |
| 32 | ZP | DO | 32 | <i>Galium aparine</i> L.                                        | A | Rubiaceae      | 0 | 0 | 0 | 0 | 0 | 0 | no |
| 33 | ZP | DO | 33 | <i>Urtica dioica</i> L.                                         | P | Urticaceae     | 0 | 0 | 0 | 0 | 0 | 0 | no |
| 34 | ZP | DO | 34 | <i>Cirsium arvense</i> (L.) Scop.                               | P | Asteraceae     | 0 | 0 | 0 | 0 | 0 | 0 | no |
| 35 | ZP | KO | 1  | <i>Carex</i> sp.                                                | P | Cyperaceae     | 0 | 0 | 0 | 0 | 0 | 0 | no |
| 36 | ZP | KO | 2  | <i>Achillea millefolium</i> L.                                  | P | Asteraceae     | 0 | 0 | 0 | 0 | 0 | 0 | no |
| 37 | ZP | KO | 3  | <i>Trifolium arvense</i> L.                                     | P | Fabaceae       | 0 | 0 | 0 | 0 | 0 | 0 | no |
| 38 | ZP | KO | 4  | <i>Matricaria maritima</i> L. subsp. <i>inodora</i> (L.) Dostal | P | Asteraceae     | 0 | 0 | 0 | 0 | 0 | 0 | no |
| 39 | ZP | KO | 5  | <i>Daucus carota</i> L.                                         | P | Apiaceae       | 0 | 0 | 0 | 0 | 0 | 0 | no |
| 40 | ZP | KO | 6  | <i>Daucus carota</i> L.                                         | P | Apiaceae       | 0 | 0 | 0 | 0 | 0 | 0 | no |
| 41 | ZP | KO | 7  | <i>Solidago virgaurea</i> L. s. str.                            | P | Asteraceae     | 0 | 0 | 0 | 0 | 0 | 0 | no |
| 42 | ZP | KO | 8  | <i>Artemisia vulgaris</i> L.                                    | P | Asteraceae     | 0 | 0 | 0 | 0 | 0 | 0 | no |
| 43 | ZP | KO | 9  | <i>Holcus lanatus</i> L.                                        | P | Poaceae        | 0 | 0 | 0 | 0 | 0 | 0 | no |
| 44 | ZP | KO | 10 | <i>Daucus carota</i> L.                                         | P | Apiaceae       | 0 | 0 | 0 | 0 | 0 | 0 | no |
| 45 | ZP | KO | 11 | <i>Artemisia vulgaris</i> L.                                    | P | Asteraceae     | 0 | 0 | 0 | 0 | 0 | 0 | no |
| 46 | ZP | KO | 12 | <i>Solidago</i> sp.                                             | P | Asteraceae     | 0 | 0 | 0 | 0 | 0 | 0 | no |
| 47 | ZP | KO | 13 | <i>Hypericum perforatum</i> L.                                  | P | Hypericaceae   | 0 | 0 | 0 | 0 | 0 | 0 | no |
| 48 | ZP | KO | 14 | <i>Solidago virgaurea</i> L. s. str.                            | P | Asteraceae     | 0 | 0 | 0 | 0 | 0 | 0 | no |
| 49 | ZP | KO | 15 | <i>Artemisia vulgaris</i> L.                                    | P | Asteraceae     | 0 | 0 | 0 | 0 | 0 | 0 | no |
| 50 | ZP | KO | 16 | <i>Trifolium arvense</i> L.                                     | P | Fabaceae       | 0 | 0 | 0 | 0 | 0 | 0 | no |
| 51 | ZP | KO | 17 | <i>Matricaria maritima</i> L. subsp. <i>inodora</i> (L.) Dostal | P | Asteraceae     | 0 | 0 | 0 | 0 | 0 | 0 | no |
| 52 | ZP | KO | 18 | <i>Vicia cracca</i> L.                                          | P | Fabaceae       | 0 | 0 | 0 | 0 | 0 | 0 | no |
| 53 | ZP | KO | 19 | <i>Achillea millefolium</i> L.                                  | P | Asteraceae     | 0 | 0 | 0 | 0 | 0 | 0 | no |
| 54 | ZP | KO | 20 | <i>Helichrysum arenarium</i> (L.) Moench                        | P | Asteraceae     | 0 | 0 | 0 | 0 | 0 | 0 | no |
| 55 | ZP | KO | 21 | <i>Galium mollugo</i> L.                                        | P | Rubiaceae      | 0 | 0 | 0 | 0 | 0 | 0 | no |
| 56 | ZP | KO | 22 | <i>Plantago major</i> L.                                        | P | Plantaginaceae | 0 | 0 | 0 | 0 | 0 | 0 | no |
| 57 | ZP | KO | 23 | <i>Solidago gigantea</i> Aiton                                  | P | Asteraceae     | 0 | 0 | 0 | 0 | 0 | 0 | no |
| 58 | ZP | KO | 24 | <i>Plantago lanceolata</i> L.                                   | P | Plantaginaceae | 0 | 0 | 0 | 0 | 0 | 0 | no |
| 59 | ZP | KO | 25 | <i>Artemisia vulgaris</i> L.                                    | P | Asteraceae     | 0 | 0 | 0 | 0 | 0 | 0 | no |

Table S2

|    |    |    |    |                                                                 |   |                 |   |   |   |   |   |   |    |
|----|----|----|----|-----------------------------------------------------------------|---|-----------------|---|---|---|---|---|---|----|
| 60 | ZP | KO | 26 | <i>Corynephorus canescens</i> L.                                | P | Poaceae         | 0 | 0 | 0 | 0 | 0 | 0 | no |
| 61 | ZP | KO | 27 | <i>Achillea millefolium</i> L.                                  | P | Asteraceae      | 0 | 0 | 0 | 0 | 0 | 0 | no |
| 62 | ZP | KO | 28 | <i>Equisetum arvense</i> L.                                     | P | Equisetaceae    | 0 | 0 | 0 | 0 | 0 | 0 | no |
| 63 | ZP | KO | 29 | <i>Solidago canadensis</i> L.                                   | P | Asteraceae      | 0 | 0 | 0 | 0 | 0 | 0 | no |
| 64 | ZP | KO | 30 | <i>Solidago virgaurea</i> L. s. str.                            | P | Asteraceae      | 0 | 0 | 0 | 0 | 0 | 0 | no |
| 65 | ZP | KO | 31 | <i>Solidago virgaurea</i> L. s. str.                            | P | Asteraceae      | 0 | 0 | 0 | 0 | 0 | 0 | no |
| 66 | ZP | KO | 32 | <i>Artemisia vulgaris</i> L.                                    | P | Asteraceae      | 0 | 0 | 0 | 0 | 0 | 0 | no |
| 67 | ZP | KO | 33 | <i>Hieracium pilosella</i> L.                                   | P | Asteraceae      | 0 | 0 | 0 | 0 | 0 | 0 | no |
| 68 | ZP | KO | 34 | <i>Melandrium album</i> (Mill.) Garcke                          | P | Caryophyllaceae | 0 | 0 | 0 | 0 | 0 | 0 | no |
| 69 | ZP | KO | 35 | <i>Cirsium arvense</i> (L.) Scop.                               | P | Asteraceae      | 0 | 0 | 0 | 0 | 0 | 0 | no |
| 70 | ZP | KO | 36 | <i>Vicia cracca</i> L.                                          | P | Fabaceae        | 0 | 0 | 0 | 0 | 0 | 0 | no |
| 71 | ZP | KO | 37 | <i>Medicago falcata</i> L.                                      | A | Fabaceae        | 0 | 0 | 0 | 0 | 0 | 0 | no |
| 72 | ZP | KO | 38 | <i>Lupinus angustifolius</i> L.                                 | A | Fabaceae        | 0 | 0 | 0 | 0 | 0 | 0 | no |
| 73 | ZP | WI | 1  | <i>Anchusa arvensis</i> (L.) M. Bieb.                           | A | Boraginaceae    | 0 | 0 | 0 | 0 | 0 | 0 | no |
| 74 | ZP | WI | 2  | <i>Solidago gigantea</i> Aiton                                  | P | Asteraceae      | 0 | 0 | 0 | 0 | 0 | 0 | no |
| 75 | ZP | WI | 3  | <i>Solidago virgaurea</i> L. s. str.                            | P | Asteraceae      | 0 | 0 | 0 | 0 | 0 | 0 | no |
| 76 | ZP | WI | 4  | <i>Matricaria maritima</i> L. subsp. <i>inodora</i> (L.) Dostal | P | Asteraceae      | 0 | 0 | 0 | 0 | 0 | 0 | no |
| 77 | ZP | WI | 5  | <i>Cirsium arvense</i> (L.) Scop.                               | P | Asteraceae      | 0 | 0 | 0 | 0 | 0 | 0 | no |
| 78 | ZP | WI | 6  | <i>Rumex crispus</i> L.                                         | P | Polygonaceae    | 0 | 0 | 0 | 0 | 0 | 0 | no |
| 79 | ZP | WI | 7  | <i>Daucus carota</i> L.                                         | P | Apiaceae        | 0 | 0 | 0 | 0 | 0 | 0 | no |
| 80 | ZP | WI | 8  | <i>Daucus carota</i> L.                                         | P | Apiaceae        | 0 | 0 | 0 | 0 | 0 | 0 | no |
| 81 | ZP | WI | 9  | <i>Erodium cicutarium</i> (L.) L'Hér.                           | A | Geraniaceae     | 0 | 0 | 0 | 0 | 0 | 0 | no |
| 82 | ZP | WI | 10 | <i>Helichrysum arenarium</i> (L.) Moench                        | P | Asteraceae      | 1 | 0 | 0 | 0 | 0 | 1 | no |
| 83 | ZP | WI | 11 | <i>Echinochloa crus-gali</i> (L.) P. Beauv.                     | A | Poaceae         | 1 | 0 | 0 | 0 | 0 | 1 | no |
| 84 | ZP | WI | 12 | <i>Spergula arvensis</i> L.                                     | A | Caryophyllaceae | 0 | 0 | 0 | 0 | 0 | 0 | no |
| 85 | ZP | WI | 13 | <i>Tanacetum vulgare</i> L.                                     | P | Asteraceae      | 0 | 0 | 0 | 0 | 0 | 0 | no |
| 86 | ZP | WI | 14 | <i>Conyza canadensis</i> (L.)                                   | A | Asteraceae      | 0 | 0 | 0 | 0 | 0 | 0 | no |
| 87 | ZP | WI | 15 | <i>Hieracium pilosella</i> L.                                   | P | Asteraceae      | 0 | 0 | 0 | 0 | 0 | 0 | no |
| 88 | ZP | WI | 16 | <i>Achillea millefolium</i> L.                                  | P | Asteraceae      | 0 | 0 | 0 | 0 | 0 | 0 | no |
| 89 | ZP | WI | 17 | <i>Solidago virgaurea</i> L. s. str.                            | P | Asteraceae      | 0 | 0 | 0 | 0 | 0 | 0 | no |
| 90 | ZP | WI | 18 | <i>Artemisia vulgaris</i> L.                                    | P | Asteraceae      | 0 | 0 | 0 | 0 | 0 | 0 | no |
| 91 | ZP | WI | 19 | <i>Berteroa incana</i> (L.) DC.                                 | A | Brassicaceae    | 0 | 0 | 0 | 0 | 0 | 0 | no |
| 92 | ZP | WI | 20 | <i>Equisetum arvense</i> L.                                     | P | Equisetaceae    | 0 | 0 | 0 | 0 | 0 | 0 | no |
| 93 | ZP | WI | 21 | <i>Achillea millefolium</i> L.                                  | P | Asteraceae      | 0 | 0 | 0 | 0 | 0 | 0 | no |
| 94 | ZP | WI | 22 | <i>Anchusa arvensis</i> (L.) M. Bieb.                           | A | Boraginaceae    | 0 | 0 | 0 | 0 | 0 | 0 | no |

Table S2

|     |    |    |    |                                                                 |   |              |   |   |   |   |   |   |     |
|-----|----|----|----|-----------------------------------------------------------------|---|--------------|---|---|---|---|---|---|-----|
| 95  | ZP | WI | 23 | <i>Helichrysum arenarium</i> (L.) Moench                        | P | Asteraceae   | 0 | 0 | 0 | 0 | 0 | 0 | no  |
| 96  | ZP | WI | 24 | <i>Knautia arvensis</i> (L.) J.M. Coult.                        | P | Dipsacaceae  | 0 | 0 | 0 | 0 | 0 | 0 | no  |
| 97  | ZP | WI | 25 | <i>Rumex acetosella</i> L.                                      | P | Polygonaceae | 0 | 0 | 0 | 0 | 0 | 0 | no  |
| 98  | ZP | WI | 26 | <i>Solidago virgaurea</i> L. s. str.                            | P | Asteraceae   | 0 | 0 | 0 | 0 | 0 | 0 | no  |
| 99  | ZP | WI | 27 | <i>Achillea millefolium</i> L.                                  | P | Asteraceae   | 1 | 0 | 1 | 0 | 0 | 2 | no  |
| 100 | ZP | WI | 28 | <i>Tanacetum vulgare</i> L.                                     | P | Asteraceae   | 0 | 0 | 0 | 0 | 0 | 0 | no  |
| 101 | ZP | WI | 29 | <i>Hypericum perforatum</i> L.                                  | P | Hypericaceae | 0 | 0 | 0 | 0 | 0 | 0 | no  |
| 102 | ZP | WI | 30 | <i>Trifolium arvense</i> L.                                     | P | Fabaceae     | 0 | 0 | 0 | 0 | 0 | 0 | no  |
| 103 | ZP | WI | 31 | <i>Vicia cracca</i> L.                                          | P | Fabaceae     | 0 | 0 | 0 | 0 | 0 | 0 | no  |
| 104 | ZP | WI | 32 | <i>Hieracium pilosella</i> L.                                   | P | Asteraceae   | 0 | 0 | 0 | 0 | 0 | 0 | no  |
| 105 | ZP | WI | 33 | <i>Tanacetum vulgare</i> L.                                     | P | Asteraceae   | 1 | 0 | 0 | 1 | 0 | 2 | no  |
| 106 | ZP | WI | 34 | <i>Cirsium arvense</i> (L.) Scop.                               | P | Asteraceae   | 0 | 0 | 0 | 0 | 0 | 0 | no  |
| 107 | ZP | WI | 35 | <i>Agrimonia eupatoria</i> L.                                   | P | Rosaceae     | 0 | 0 | 0 | 0 | 0 | 0 | no  |
| 108 | ZP | WI | 36 | <i>Carduus nutans</i> L.                                        | P | Asteraceae   | 0 | 0 | 0 | 0 | 0 | 0 | no  |
| 109 | ZP | WI | 37 | <i>Matricaria maritima</i> L. subsp. <i>inodora</i> (L.) Dostal | P | Asteraceae   | 0 | 0 | 0 | 0 | 0 | 0 | no  |
| 110 | ZP | WI | 38 | <i>Equisetum arvense</i> L.                                     | P | Equisetaceae | 1 | 0 | 0 | 0 | 0 | 1 | no  |
| 111 | ZP | WI | 39 | <i>Achillea millefolium</i> L.                                  | P | Asteraceae   | 0 | 0 | 0 | 0 | 0 | 0 | no  |
| 112 | ZP | WI | 40 | <i>Conyza acris</i>                                             | A | Asteraceae   | 0 | 0 | 0 | 0 | 0 | 0 | no  |
| 113 | ZP | WI | 41 | <i>Daucus carota</i> L.                                         | P | Apiaceae     | 0 | 0 | 0 | 0 | 0 | 0 | no  |
| 114 | KP | BC | 1  | <i>Echinochloa crus-gali</i> (L.) P. Beauv.                     | A | Poaceae      | 0 | 0 | 0 | 0 | 0 | 0 | no  |
| 115 | KP | BC | 2  | <i>Galinsoga ciliata</i> (Raf.) S.F. Blake                      | A | Asteraceae   | 0 | 0 | 0 | 0 | 0 | 0 | no  |
| 116 | KP | BC | 3  | <i>Polygonum lapathifolium</i> ssp. <i>lapathifolium</i>        | A | Polygonaceae | 0 | 0 | 0 | 1 | 0 | 1 | no  |
| 117 | KP | BC | 4  | <i>Achillea millefolium</i> L.                                  | P | Asteraceae   | 0 | 0 | 0 | 0 | 0 | 0 | no  |
| 118 | KP | BC | 5  | <i>Cichorium intybus</i> L.                                     | P | Asteraceae   | 1 | 1 | 1 | 1 | 0 | 4 | yes |
| 119 | KP | BC | 6  | <i>Thlaspi arvense</i> L.                                       | A | Brassicaceae | 0 | 0 | 0 | 0 | 0 | 0 | no  |
| 120 | KP | BC | 7  | <i>Cirsium arvense</i> (L.) Scop.                               | P | Asteraceae   | 0 | 0 | 0 | 0 | 0 | 0 | no  |
| 121 | KP | BC | 8  | <i>Barbarea vulgaris</i> R. Br.                                 | P | Brassicaceae | 0 | 0 | 0 | 0 | 0 | 0 | no  |
| 122 | KP | BC | 9  | <i>Solanum tuberosum</i> L.                                     | P | Solanaceae   | 0 | 0 | 0 | 0 | 0 | 0 | no  |
| 123 | KP | BC | 10 | <i>Rorippa amphibia</i> (L.) Besser                             | P | Brassicaceae | 0 | 0 | 0 | 0 | 0 | 0 | no  |
| 124 | KP | BC | 11 | <i>Erodium cicutarium</i> (L.) L'Hér.                           | A | Geraniaceae  | 0 | 0 | 1 | 1 | 0 | 2 | no  |
| 125 | KP | BC | 12 | <i>Galium aparine</i> L.                                        | A | Rubiaceae    | 0 | 0 | 0 | 0 | 0 | 0 | no  |
| 126 | KP | BC | 13 | <i>Daucus carota</i> L.                                         | P | Apiaceae     | 0 | 0 | 0 | 0 | 0 | 0 | no  |
| 127 | KP | BC | 14 | <i>Trifolium pratense</i> L.                                    | P | Fabaceae     | 0 | 0 | 0 | 0 | 0 | 0 | no  |
| 128 | KP | BC | 15 | <i>Trifolium repens</i>                                         | P | Fabaceae     | 0 | 0 | 0 | 0 | 0 | 0 | no  |
| 129 | KP | BC | 16 | <i>Anchusa arvensis</i> (L.) M. Bieb.                           | A | Boraginaceae | 0 | 0 | 0 | 0 | 0 | 0 | no  |

Table S2

|     |    |    |    |                                                                 |   |                |   |   |   |   |   |   |     |
|-----|----|----|----|-----------------------------------------------------------------|---|----------------|---|---|---|---|---|---|-----|
| 130 | KP | BC | 17 | <i>Artemisia vulgaris</i> L.                                    | P | Asteraceae     | 0 | 0 | 0 | 0 | 0 | 0 | no  |
| 131 | KP | BC | 18 | <i>Polygonum aviculare</i> L.                                   | A | Polygonaceae   | 0 | 0 | 0 | 1 | 0 | 1 | no  |
| 132 | KP | BC | 19 | <i>Matricaria maritima</i> L. subsp. <i>inodora</i> (L.) Dostal | P | Asteraceae     | 0 | 0 | 0 | 0 | 0 | 0 | no  |
| 133 | KP | BC | 20 | <i>Viola arvensis</i> Murray                                    | A | Violaceae      | 0 | 0 | 0 | 0 | 0 | 0 | no  |
| 134 | KP | BC | 21 | <i>Geranium pusillum</i> Burm. F. ex. L.                        | A | Geraniaceae    | 0 | 0 | 0 | 0 | 0 | 0 | no  |
| 135 | KP | BC | 22 | <i>Fallopia convolvulus</i> (L.) Á. Löve                        | A | Polygonaceae   | 0 | 0 | 0 | 0 | 0 | 0 | no  |
| 136 | KP | BC | 23 | <i>Chenopodium album</i> L.                                     | A | Amaranthaceae  | 0 | 0 | 0 | 0 | 0 | 0 | no  |
| 137 | KP | BC | 24 | <i>Centaurea cyanus</i> L.                                      | A | Asteraceae     | 0 | 1 | 0 | 0 | 0 | 1 | no  |
| 138 | KP | BC | 25 | <i>Lamium purpureum</i> L.                                      | A | Lamiaceae      | 0 | 0 | 0 | 0 | 0 | 0 | no  |
| 139 | KP | BC | 26 | <i>Trifolium repens</i>                                         | P | Fabaceae       | 0 | 0 | 0 | 0 | 0 | 0 | no  |
| 140 | KP | KR | 1  | <i>Elymus repens</i> (L.) Gould                                 | P | Poaceae        | 0 | 1 | 0 | 1 | 0 | 2 | no  |
| 141 | KP | KR | 2  | <i>Galinsoga parviflora</i> Cav.                                | A | Asteraceae     | 0 | 0 | 0 | 0 | 0 | 0 | no  |
| 142 | KP | KR | 3  | <i>Echinochloa crus-gali</i> (L.) P. Beauv.                     | A | Poaceae        | 0 | 0 | 0 | 0 | 1 | 1 | no  |
| 143 | KP | KR | 4  | <i>Rosa</i> sp.                                                 | P | Rosaceae       | 0 | 0 | 0 | 0 | 0 | 0 | no  |
| 144 | KP | KR | 5  | <i>Chenopodium album</i> L.                                     | A | Amaranthaceae  | 0 | 0 | 0 | 0 | 0 | 0 | no  |
| 145 | KP | KR | 6  | <i>Stachys palustris</i> L.                                     | P | Lamiaceae      | 0 | 0 | 0 | 0 | 0 | 0 | no  |
| 146 | KP | KR | 7  | <i>Equisetum arvense</i> L.                                     | P | Equisetaceae   | 0 | 0 | 0 | 1 | 0 | 1 | no  |
| 147 | KP | KR | 8  | <i>Quercus robur</i> L.                                         | P | Fagaceae       | 0 | 0 | 0 | 0 | 0 | 0 | no  |
| 148 | KP | M1 | 1  | <i>Equisetum arvense</i> L.                                     | P | Equisetaceae   | 0 | 0 | 0 | 0 | 0 | 0 | no  |
| 149 | KP | M1 | 2  | <i>Galinsoga parviflora</i> Cav.                                | A | Asteraceae     | 0 | 0 | 0 | 0 | 0 | 0 | no  |
| 150 | KP | M1 | 3  | <i>Echinochloa crus-gali</i> (L.) P. Beauv.                     | A | Poaceae        | 0 | 0 | 0 | 1 | 1 | 2 | no  |
| 151 | KP | M1 | 4  | <i>Chenopodium album</i> L.                                     | A | Amaranthaceae  | 0 | 0 | 0 | 0 | 0 | 0 | no  |
| 152 | KP | M2 | 1  | <i>Chenopodium album</i> L.                                     | A | Amaranthaceae  | 0 | 0 | 0 | 0 | 0 | 0 | no  |
| 153 | KP | M2 | 3  | <i>Papaver rhoeas</i> L.                                        | A | Papaveraceae   | 0 | 0 | 0 | 0 | 0 | 0 | no  |
| 154 | KP | M2 | 4  | <i>Urtica dioica</i> L.                                         | P | Urticaceae     | 0 | 0 | 0 | 0 | 0 | 0 | no  |
| 155 | KP | M2 | 5  | <i>Euphorbia</i> sp.                                            | P | Euphorbiaceae  | 0 | 0 | 0 | 0 | 0 | 0 | no  |
| 156 | KP | M2 | 6  | <i>Geranium</i> sp.                                             | A | Geraniaceae    | 0 | 0 | 0 | 0 | 0 | 0 | no  |
| 157 | KP | M2 | 7  | <i>Plantago major</i> L.                                        | P | Plantaginaceae | 0 | 0 | 0 | 0 | 0 | 0 | no  |
| 158 | KP | M2 | 8  | <i>Chenopodium album</i> L.                                     | A | Amaranthaceae  | 0 | 0 | 0 | 0 | 0 | 0 | no  |
| 159 | KP | M3 | 1  | <i>Festuca pratensis</i> Huds.                                  | P | Poaceae        | 0 | 1 | 1 | 1 | 1 | 4 | no  |
| 160 | KP | M3 | 2  | <i>Chenopodium album</i> L.                                     | A | Amaranthaceae  | 1 | 0 | 0 | 0 | 0 | 1 | no  |
| 161 | KP | M3 | 3  | <i>Galinsoga parviflora</i> Cav.                                | A | Asteraceae     | 0 | 0 | 0 | 0 | 0 | 0 | no  |
| 162 | KP | M4 | 1  | <i>Crepis tectorum</i> L.                                       | A | Asteraceae     | 1 | 1 | 1 | 1 | 1 | 5 | yes |
| 163 | KP | M4 | 1  | <i>Solanum lycopersicum</i> L.                                  | A | Solanaceae     | 1 | 0 | 0 | 0 | 0 | 1 | no  |
| 164 | KP | M4 | 2  | <i>Solanum lycopersicum</i> L.                                  | A | Solanaceae     | 1 | 0 | 1 | 1 | 1 | 4 | no  |

Table S2

|     |    |    |    |                                                          |   |                 |   |   |   |   |   |   |     |
|-----|----|----|----|----------------------------------------------------------|---|-----------------|---|---|---|---|---|---|-----|
| 165 | KP | M4 | 2  | <i>Galinsoga parviflora</i> Cav.                         | A | Asteraceae      | 1 | 0 | 0 | 0 | 0 | 1 | no  |
| 166 | KP | M4 | 3  | <i>Echinochloa crus-gali</i> (L.) P. Beauv.              | A | Poaceae         | 0 | 0 | 0 | 1 | 1 | 2 | no  |
| 167 | KP | M4 | 4  | <i>Erodium cicutarium</i> (L.) L'Hér.                    | A | Geraniaceae     | 0 | 0 | 0 | 0 | 0 | 0 | no  |
| 168 | KP | M4 | 5  | <i>Urtica urens</i> L.                                   | A | Urticaceae      | 0 | 0 | 1 | 0 | 0 | 1 | no  |
| 169 | PD | KU | 1  | <i>Anthemis arvensis</i> L.                              | A | Asteraceae      | 0 | 0 | 0 | 0 | 0 | 0 | no  |
| 170 | PD | KU | 2  | <i>Chenopodium album</i> L.                              | A | Amaranthaceae   | 0 | 0 | 0 | 0 | 0 | 0 | no  |
| 171 | PD | KU | 3  | <i>Chenopodium album</i> L.                              | A | Amaranthaceae   | 0 | 0 | 0 | 0 | 0 | 0 | no  |
| 172 | PD | KU | 4  | <i>Chenopodium album</i> L.                              | A | Amaranthaceae   | 0 | 0 | 0 | 0 | 0 | 0 | no  |
| 173 | PD | KU | 5  | <i>Chenopodium album</i> L.                              | A | Amaranthaceae   | 0 | 0 | 0 | 0 | 0 | 0 | no  |
| 174 | PD | KU | 6  | <i>Chenopodium album</i> L.                              | A | Amaranthaceae   | 1 | 1 | 0 | 0 | 0 | 2 | yes |
| 175 | PD | KU | 7  | <i>Chenopodium album</i> L.                              | A | Amaranthaceae   | 0 | 0 | 0 | 0 | 0 | 0 | no  |
| 176 | PD | KU | 8  | <i>Chenopodium album</i> L.                              | A | Amaranthaceae   | 0 | 0 | 0 | 0 | 0 | 0 | no  |
| 177 | PD | KU | 9  | <i>Chenopodium album</i> L.                              | A | Amaranthaceae   | 0 | 0 | 0 | 0 | 0 | 0 | no  |
| 178 | PD | KU | 10 | <i>Equisetum arvense</i> L.                              | P | Equisetaceae    | 0 | 0 | 0 | 0 | 0 | 0 | no  |
| 179 | PD | KU | 11 | <i>Echinochloa crus-gali</i> (L.) P. Beauv.              | A | Poaceae         | 0 | 0 | 0 | 0 | 0 | 0 | no  |
| 180 | PD | KU | 12 | <i>Echinochloa crus-gali</i> (L.) P. Beauv.              | A | Poaceae         | 0 | 0 | 0 | 0 | 0 | 0 | no  |
| 181 | PD | KU | 13 | <i>Echinochloa crus-gali</i> (L.) P. Beauv.              | A | Poaceae         | 0 | 0 | 0 | 0 | 0 | 0 | no  |
| 182 | PD | KU | 14 | <i>Crepis tectorum</i> L.                                | A | Asteraceae      | 1 | 0 | 0 | 1 | 0 | 2 | no  |
| 183 | PD | KU | 15 | <i>Erodium cicutarium</i> (L.) L'Hér.                    | A | Geraniaceae     | 0 | 0 | 0 | 0 | 0 | 0 | no  |
| 184 | PD | KU | 16 | <i>Erodium cicutarium</i> (L.) L'Hér.                    | A | Geraniaceae     | 0 | 0 | 0 | 0 | 0 | 0 | no  |
| 185 | PD | KU | 17 | <i>Polygonum lapathifolium</i> ssp. <i>lapathifolium</i> | A | Polygonaceae    | 0 | 0 | 0 | 0 | 0 | 0 | no  |
| 186 | PD | KU | 18 | <i>Convolvulus arvensis</i> L.                           | P | Convolvulaceae  | 0 | 0 | 0 | 0 | 0 | 0 | no  |
| 187 | PD | KU | 19 | <i>Viola arvensis</i> Murray                             | A | Violaceae       | 0 | 0 | 0 | 0 | 0 | 0 | no  |
| 188 | PD | KU | 20 | <i>Sinapis arvensis</i> L.                               | A | Brassicaceae    | 0 | 0 | 0 | 0 | 0 | 0 | no  |
| 189 | PD | KU | 21 | <i>Spergula arvensis</i> L.                              | A | Caryophyllaceae | 0 | 0 | 0 | 0 | 0 | 0 | no  |
| 190 | PD | KU | 22 | <i>Anthemis arvensis</i> L.                              | A | Asteraceae      | 0 | 0 | 0 | 0 | 0 | 0 | no  |
| 191 | PD | KU | 23 | <i>Galeopsis tetrahit</i> L.                             | A | Lamiaceae       | 0 | 0 | 0 | 0 | 0 | 0 | no  |
| 192 | PD | KU | 24 | <i>Artemisia vulgaris</i> L.                             | P | Asteraceae      | 0 | 0 | 0 | 0 | 0 | 0 | no  |
| 193 | PD | KU | 25 | <i>Achillea millefolium</i> L.                           | P | Asteraceae      | 0 | 0 | 0 | 0 | 0 | 0 | no  |
| 194 | PD | KU | 26 | <i>Knautia arvensis</i> (L.) J.M. Coult.                 | P | Dipsacaceae     | 0 | 0 | 0 | 0 | 0 | 0 | no  |
| 195 | PD | KU | 27 | <i>Vicia cracca</i> L.                                   | P | Fabaceae        | 0 | 0 | 0 | 0 | 0 | 0 | no  |
| 196 | PD | KU | 28 | <i>Pimpinella saxifraga</i> L.                           | P | Apiaceae        | 0 | 0 | 0 | 0 | 0 | 0 | no  |
| 197 | PD | KU | 29 | <i>Pimpinella saxifraga</i> L.                           | P | Apiaceae        | 0 | 0 | 0 | 0 | 0 | 0 | no  |
| 198 | PD | KU | 30 | <i>Galium verum</i> L.                                   | P | Rubiaceae       | 0 | 0 | 0 | 0 | 0 | 0 | no  |
| 199 | PD | KU | 31 | <i>Melilotus officinalis</i> (L.) Pall.                  | P | Fabaceae        | 0 | 0 | 0 | 0 | 0 | 0 | no  |

Table S2

|     |    |    |    |                                                                 |   |                       |   |   |   |   |   |   |    |
|-----|----|----|----|-----------------------------------------------------------------|---|-----------------------|---|---|---|---|---|---|----|
| 200 | PD | RZ | 1  | <i>Equisetum arvense</i> L.                                     | P | <i>Equisetaceae</i>   | 0 | 0 | 0 | 0 | 0 | 0 | no |
| 201 | PD | RZ | 2  | <i>Galinsoga parviflora</i> Cav.                                | A | <i>Asteraceae</i>     | 0 | 0 | 0 | 0 | 0 | 0 | no |
| 202 | PD | RZ | 3  | <i>Galinsoga parviflora</i> Cav.                                | A | <i>Asteraceae</i>     | 0 | 0 | 0 | 0 | 0 | 0 | no |
| 203 | PD | RZ | 4  | <i>Galinsoga parviflora</i> Cav.                                | A | <i>Asteraceae</i>     | 1 | 0 | 0 | 0 | 0 | 1 | no |
| 204 | PD | RZ | 5  | <i>Galinsoga parviflora</i> Cav.                                | A | <i>Asteraceae</i>     | 0 | 0 | 0 | 0 | 0 | 0 | no |
| 205 | PD | RZ | 6  | <i>Polygonum lapathifolium</i> ssp. <i>lapathifolium</i>        | A | <i>Polygonaceae</i>   | 0 | 0 | 0 | 0 | 0 | 0 | no |
| 206 | PD | RZ | 7  | <i>Chenopodium album</i> L.                                     | A | <i>Amaranthaceae</i>  | 0 | 0 | 0 | 0 | 0 | 0 | no |
| 207 | PD | RZ | 8  | <i>Chenopodium album</i> L.                                     | A | <i>Amaranthaceae</i>  | 0 | 0 | 0 | 0 | 0 | 0 | no |
| 208 | PD | RZ | 9  | <i>Chenopodium album</i> L.                                     | A | <i>Amaranthaceae</i>  | 0 | 0 | 0 | 0 | 0 | 0 | no |
| 209 | PD | RZ | 10 | <i>Echinochloa crus-gali</i> (L.) P. Beauv.                     | A | <i>Poaceae</i>        | 0 | 0 | 0 | 0 | 0 | 0 | no |
| 210 | PD | RZ | 11 | <i>Echinochloa crus-gali</i> (L.) P. Beauv.                     | A | <i>Poaceae</i>        | 0 | 0 | 0 | 0 | 0 | 0 | no |
| 211 | PD | RZ | 12 | <i>Echinochloa crus-gali</i> (L.) P. Beauv.                     | A | <i>Poaceae</i>        | 0 | 0 | 0 | 0 | 0 | 0 | no |
| 212 | PD | RZ | 13 | <i>Sinapis arvensis</i> L.                                      | A | <i>Brassicaceae</i>   | 0 | 0 | 0 | 0 | 0 | 0 | no |
| 213 | PD | RZ | 14 | <i>Erodium cicutarium</i> (L.) L'Hér.                           | A | <i>Geraniaceae</i>    | 0 | 0 | 0 | 0 | 0 | 0 | no |
| 214 | PD | RZ | 15 | <i>Teraxacum officinale</i> F.H. Wigg.                          | P | <i>Asteraceae</i>     | 1 | 0 | 0 | 0 | 0 | 1 | no |
| 215 | PD | RZ | 16 | <i>Solanum tuberosum</i> L.                                     | P | <i>Solanaceae</i>     | 0 | 0 | 0 | 0 | 1 | 1 | no |
| 216 | PD | RZ | 17 | <i>Polygonum lapathifolium</i> ssp. <i>lapathifolium</i>        | A | <i>Polygonaceae</i>   | 0 | 0 | 0 | 0 | 0 | 0 | no |
| 217 | PD | RZ | 18 | <i>Artemisia vulgaris</i> L.                                    | P | <i>Asteraceae</i>     | 1 | 0 | 0 | 0 | 0 | 1 | no |
| 218 | PD | RZ | 19 | <i>Achillea millefolium</i> L.                                  | P | <i>Asteraceae</i>     | 0 | 0 | 0 | 0 | 0 | 0 | no |
| 219 | PD | RZ | 20 | <i>Plantago lanceolata</i> L.                                   | P | <i>Plantaginaceae</i> | 0 | 0 | 0 | 0 | 0 | 0 | no |
| 220 | PD | RZ | 21 | <i>Vicia tetrasperma</i> (L.) Schreb.                           | A | <i>Fabaceae</i>       | 0 | 0 | 0 | 0 | 0 | 0 | no |
| 221 | PD | RZ | 22 | <i>Trifolium pratense</i> L.                                    | P | <i>Fabaceae</i>       | 0 | 0 | 0 | 0 | 0 | 0 | no |
| 222 | PD | RZ | 23 | <i>Matricaria maritima</i> L. subsp. <i>inodora</i> (L.) Dostal | P | <i>Asteraceae</i>     | 0 | 0 | 0 | 0 | 0 | 0 | no |
| 223 | PD | RZ | 24 | <i>Conyza canadensis</i> (L.)                                   | A | <i>Asteraceae</i>     | 0 | 0 | 0 | 0 | 0 | 0 | no |
| 224 | DS | BG | 1  | <i>Viola arvensis</i> Murray                                    | A | <i>Violaceae</i>      | 0 | 0 | 0 | 0 | 0 | 0 | no |
| 225 | DS | BG | 2  | <i>Achillea millefolium</i> L.                                  | P | <i>Asteraceae</i>     | 0 | 0 | 0 | 0 | 0 | 0 | no |
| 226 | DS | BG | 3  | <i>Convolvulus arvensis</i> L.                                  | P | <i>Convolvulaceae</i> | 0 | 0 | 0 | 0 | 0 | 0 | no |
| 227 | DS | BG | 4  | <i>Polygonum lapathifolium</i> ssp. <i>lapathifolium</i>        | A | <i>Polygonaceae</i>   | 0 | 0 | 0 | 0 | 0 | 0 | no |
| 228 | DS | BG | 5  | <i>Vicia cracca</i> L.                                          | P | <i>Fabaceae</i>       | 0 | 0 | 0 | 0 | 1 | 1 | no |
| 229 | DS | BG | 6  | <i>Vicia angustifolia</i> L.                                    | A | <i>Fabaceae</i>       | 1 | 0 | 0 | 0 | 1 | 2 | no |
| 230 | DS | BG | 7  | <i>Galinsoga ciliata</i> (Raf.) S.F. Blake                      | A | <i>Asteraceae</i>     | 0 | 0 | 0 | 0 | 0 | 0 | no |
| 231 | DS | BG | 8  | <i>Chenopodium album</i> L.                                     | A | <i>Amaranthaceae</i>  | 0 | 0 | 0 | 0 | 0 | 0 | no |
| 232 | DS | BG | 9  | <i>Elymus repens</i> (L.) Gould                                 | P | <i>Poaceae</i>        | 0 | 0 | 0 | 0 | 0 | 0 | no |
| 233 | DS | BG | 10 | <i>Poa annua</i> L.                                             | A | <i>Poaceae</i>        | 0 | 0 | 0 | 0 | 0 | 0 | no |
| 234 | DS | BG | 11 | <i>Achillea millefolium</i> L.                                  | P | <i>Asteraceae</i>     | 0 | 0 | 0 | 0 | 0 | 0 | no |



Table S2

|     |    |    |    |                                                                 |   |                      |   |   |   |   |   |   |     |
|-----|----|----|----|-----------------------------------------------------------------|---|----------------------|---|---|---|---|---|---|-----|
| 235 | DS | BG | 12 | <i>Trifolium sp.</i>                                            | P | <i>Fabaceae</i>      | 0 | 0 | 0 | 0 | 0 | 0 | no  |
| 236 | DS | BG | 13 | <i>Matricaria maritima</i> L. subsp. <i>inodora</i> (L.) Dostal | P | <i>Asteraceae</i>    | 0 | 0 | 0 | 0 | 0 | 0 | no  |
| 237 | DS | BG | 14 | <i>Lolium perenne</i> L.                                        | P | <i>Poaceae</i>       | 0 | 0 | 0 | 0 | 0 | 0 | no  |
| 238 | DS | BG | 15 | <i>Brassica napus</i> L. subsp. <i>napus</i>                    | P | <i>Brassicaceae</i>  | 0 | 0 | 0 | 0 | 0 | 0 | no  |
| 239 | DS | BG | 16 | <i>Geranium pusillum</i> Burm. F. ex. L.                        | A | <i>Geraniaceae</i>   | 0 | 0 | 0 | 0 | 0 | 0 | no  |
| 240 | DS | BG | 17 | <i>Artemisia vulgaris</i> L.                                    | P | <i>Asteraceae</i>    | 1 | 1 | 0 | 0 | 0 | 2 | yes |
| 241 | DS | BG | 18 | <i>Galinsoga sp.</i>                                            | A | <i>Asteraceae</i>    | 1 | 0 | 0 | 0 | 0 | 1 | no  |
| 242 | DS | BG | 19 | <i>Echinochloa crus-gali</i> (L.) P. Beauv.                     | A | <i>Poaceae</i>       | 1 | 0 | 0 | 0 | 0 | 1 | no  |
| 243 | DS | BG | 20 | <i>Galinsoga ciliata</i> (Raf.) S.F. Blake                      | A | <i>Asteraceae</i>    | 1 | 1 | 0 | 0 | 0 | 2 | yes |
| 244 | DS | BG | 21 | <i>Galinsoga sp.</i>                                            | A | <i>Asteraceae</i>    | 0 | 0 | 0 | 0 | 0 | 0 | no  |
| 245 | DS | CE | 1  | <i>Setaria pumila</i> (Poir.) Roem.& Schult.                    | A | <i>Poaceae</i>       | 0 | 0 | 0 | 0 | 0 | 0 | no  |
| 246 | DS | CE | 2  | <i>Chenopodium album</i> L.                                     | A | <i>Amaranthaceae</i> | 0 | 0 | 0 | 0 | 1 | 1 | no  |
| 247 | DS | CE | 3  | <i>Polygonum lapathifolium</i> ssp. <i>lapathifolium</i>        | A | <i>Polygonaceae</i>  | 0 | 0 | 0 | 0 | 0 | 0 | no  |
| 248 | DS | CE | 4  | <i>Euphorbia helioscopia</i> L.                                 | A | <i>Euphorbiaceae</i> | 0 | 0 | 0 | 0 | 0 | 0 | no  |
| 249 | DS | CE | 5  | <i>Myosotis arvensis</i> (L.) Hill.                             | A | <i>Boraginaceae</i>  | 1 | 0 | 0 | 0 | 0 | 1 | no  |
| 250 | DS | CE | 6  | <i>Erysimum cheiranthoides</i> L.                               | A | <i>Brassicaceae</i>  | 0 | 0 | 0 | 0 | 0 | 0 | no  |
| 251 | DS | CE | 7  | <i>Stachys palustris</i> L.                                     | P | <i>Lamiaceae</i>     | 0 | 0 | 0 | 0 | 0 | 0 | no  |
| 252 | DS | CE | 8  | <i>Matricaria maritima</i> L. subsp. <i>inodora</i> (L.) Dostal | P | <i>Asteraceae</i>    | 0 | 0 | 0 | 0 | 0 | 0 | no  |
| 253 | DS | CE | 9  | <i>Capsella bursa-pastoris</i> (L.) Medik                       | A | <i>Brassicaceae</i>  | 0 | 0 | 0 | 0 | 0 | 0 | no  |
| 254 | DS | CE | 10 | <i>Euphorbia exigua</i> L.                                      | P | <i>Euphorbiaceae</i> | 0 | 0 | 0 | 0 | 0 | 0 | no  |
| 255 | DS | CE | 11 | <i>Centaurea cyanus</i> L.                                      | A | <i>Asteraceae</i>    | 0 | 0 | 0 | 0 | 0 | 0 | no  |
| 256 | DS | CE | 12 | <i>Erysimum cheiranthoides</i> L.                               | A | <i>Brassicaceae</i>  | 0 | 0 | 0 | 0 | 0 | 0 | no  |
| 257 | DS | CE | 13 | <i>Sonchus oleraceus</i> L.                                     | A | <i>Asteraceae</i>    | 1 | 0 | 0 | 0 | 0 | 1 | no  |
| 258 | DS | CE | 14 | <i>Galium aparine</i> L.                                        | A | <i>Rubiaceae</i>     | 0 | 0 | 0 | 0 | 0 | 0 | no  |
| 259 | DS | CE | 15 | <i>Equisetum arvense</i> L.                                     | P | <i>Equisetaceae</i>  | 0 | 0 | 0 | 0 | 0 | 0 | no  |
| 260 | DS | CE | 16 | <i>Euphorbia helioscopia</i> L.                                 | A | <i>Euphorbiaceae</i> | 0 | 0 | 0 | 0 | 0 | 0 | no  |
| 261 | DS | CE | 17 | <i>Thlaspi arvense</i> L.                                       | A | <i>Brassicaceae</i>  | 1 | 0 | 0 | 0 | 1 | 2 | no  |
| 262 | DS | CE | 18 | <i>Tanacetum vulgare</i> L.                                     | P | <i>Asteraceae</i>    | 1 | 0 | 0 | 0 | 0 | 1 | no  |
| 263 | DS | CE | 19 | <i>Matricaria maritima</i> L. subsp. <i>inodora</i> (L.) Dostal | P | <i>Asteraceae</i>    | 1 | 0 | 0 | 0 | 0 | 1 | no  |
| 264 | DS | CE | 20 | <i>Setaria viridis</i> (L.) P.B.                                | A | <i>Poaceae</i>       | 0 | 0 | 0 | 0 | 0 | 0 | no  |
| 265 | DS | CE | 21 | <i>Viola arvensis</i> Murray                                    | A | <i>Violaceae</i>     | 0 | 0 | 0 | 0 | 0 | 0 | no  |
| 266 | DS | CE | 22 | <i>Stachys palustris</i> L.                                     | P | <i>Lamiaceae</i>     | 0 | 0 | 0 | 0 | 0 | 0 | no  |
| 267 | DS | CE | 23 | <i>Achillea millefolium</i> L.                                  | P | <i>Asteraceae</i>    | 0 | 0 | 0 | 0 | 0 | 0 | no  |
| 268 | DS | MK | 1  | <i>Chenopodium album</i> L.                                     | A | <i>Amaranthaceae</i> | 0 | 0 | 0 | 0 | 1 | 1 | no  |
| 269 | DS | MK | 2  | <i>Galinsoga ciliata</i> (Raf.) S.F. Blake                      | A | <i>Asteraceae</i>    | 0 | 1 | 0 | 0 | 0 | 1 | no  |



Table S2

|     |    |    |    |                                                                 |   |                |   |   |   |   |   |   |    |
|-----|----|----|----|-----------------------------------------------------------------|---|----------------|---|---|---|---|---|---|----|
| 270 | DS | MK | 3  | <i>Viola arvensis</i> Murray                                    | A | Violaceae      | 0 | 0 | 0 | 0 | 0 | 0 | no |
| 271 | DS | MK | 4  | <i>Equisetum arvense</i> L.                                     | P | Equisetaceae   | 0 | 0 | 0 | 0 | 0 | 0 | no |
| 272 | DS | MK | 5  | <i>Polygonum lapathifolium</i> ssp. <i>lapathifolium</i>        | A | Polygonaceae   | 0 | 0 | 0 | 0 | 0 | 0 | no |
| 273 | DS | MK | 6  | <i>Echinochloa crus-gali</i> (L.) P. Beauv.                     | A | Poaceae        | 0 | 0 | 0 | 0 | 0 | 0 | no |
| 274 | DS | MK | 7  | <i>Cirsium arvense</i> (L.) Scop.                               | P | Asteraceae     | 0 | 0 | 0 | 0 | 0 | 0 | no |
| 275 | DS | MK | 8  | <i>Cirsium arvense</i> (L.) Scop.                               | P | Asteraceae     | 0 | 0 | 0 | 0 | 0 | 0 | no |
| 276 | DS | MK | 9  | <i>Galinsoga ciliata</i> (Raf.) S.F. Blake                      | A | Asteraceae     | 0 | 0 | 0 | 0 | 0 | 0 | no |
| 277 | DS | MK | 10 | <i>Viola arvensis</i> Murray                                    | A | Violaceae      | 1 | 0 | 0 | 0 | 0 | 1 | no |
| 278 | DS | MK | 11 | <i>Polygonum persicaria</i> L.                                  | A | Polygonaceae   | 0 | 0 | 0 | 0 | 0 | 0 | no |
| 279 | DS | MK | 12 | <i>Galinsoga ciliata</i> (Raf.) S.F. Blake                      | A | Asteraceae     | 0 | 0 | 0 | 0 | 0 | 0 | no |
| 280 | DS | MK | 13 | <i>Viola arvensis</i> Murray                                    | A | Violaceae      | 0 | 0 | 0 | 0 | 0 | 0 | no |
| 281 | DS | MK | 14 | <i>Sambucus nigra</i> L.                                        | P | Adoxaceae      | 0 | 0 | 0 | 0 | 0 | 0 | no |
| 282 | DS | MK | 15 | <i>Matricaria maritima</i> L. subsp. <i>inodora</i> (L.) Dostal | P | Asteraceae     | 1 | 0 | 0 | 0 | 0 | 1 | no |
| 283 | DS | MK | 16 | <i>Equisetum arvense</i> L.                                     | P | Equisetaceae   | 0 | 0 | 0 | 0 | 0 | 0 | no |
| 284 | DS | MK | 17 | <i>Polygonum lapathifolium</i> ssp. <i>lapathifolium</i>        | A | Polygonaceae   | 0 | 0 | 0 | 0 | 0 | 0 | no |
| 285 | DS | MK | 18 | <i>Galinsoga</i> sp.                                            | A | Asteraceae     | 1 | 0 | 0 | 0 | 0 | 1 | no |
| 286 | DS | MK | 19 | <i>Chenopodium album</i> L.                                     | A | Amaranthaceae  | 0 | 0 | 0 | 0 | 1 | 1 | no |
| 287 | DS | MK | 20 | <i>Echinochloa crus-gali</i> (L.) P. Beauv.                     | A | Poaceae        | 0 | 0 | 0 | 0 | 0 | 0 | no |
| 288 | DS | MK | 21 | <i>Echinochloa crus-gali</i> (L.) P. Beauv.                     | A | Poaceae        | 0 | 0 | 0 | 0 | 0 | 0 | no |
| 289 | DS | MK | 22 | <i>Rumex acetosella</i> L.                                      | P | Polygonaceae   | 0 | 0 | 0 | 0 | 0 | 0 | no |
| 290 | DS | MK | 23 | <i>Polygonum persicaria</i> L.                                  | A | Polygonaceae   | 0 | 0 | 0 | 0 | 0 | 0 | no |
| 291 | DS | SK | 1  | <i>Echinochloa crus-gali</i> (L.) P. Beauv.                     | A | Poaceae        | 0 | 0 | 0 | 0 | 0 | 0 | no |
| 292 | DS | SK | 2  | <i>Matricaria maritima</i> L. subsp. <i>inodora</i> (L.) Dostal | P | Asteraceae     | 0 | 0 | 0 | 0 | 0 | 0 | no |
| 293 | DS | SK | 3  | <i>Viola arvensis</i> Murray                                    | A | Violaceae      | 0 | 0 | 0 | 0 | 0 | 0 | no |
| 294 | DS | SK | 4  | <i>Plantago major</i> L.                                        | P | Plantaginaceae | 0 | 0 | 0 | 0 | 0 | 0 | no |
| 295 | DS | SK | 5  | <i>Capsella bursa-pastoris</i> (L.) Medik                       | A | Brassicaceae   | 0 | 0 | 0 | 0 | 0 | 0 | no |
| 296 | DS | SK | 6  | <i>Galinsoga ciliata</i> (Raf.) S.F. Blake                      | A | Asteraceae     | 1 | 0 | 0 | 0 | 0 | 1 | no |
| 297 | DS | SK | 7  | <i>Myosotis arvensis</i> (L.) Hill.                             | A | Boraginaceae   | 1 | 0 | 0 | 0 | 0 | 1 | no |
| 298 | DS | SK | 8  | <i>Chenopodium album</i> L.                                     | A | Amaranthaceae  | 1 | 0 | 0 | 0 | 0 | 1 | no |
| 299 | DS | SK | 9  | <i>Gnaphalium uliginosum</i> L.                                 | A | Asteraceae     | 1 | 0 | 1 | 0 | 0 | 2 | no |
| 300 | DS | SK | 10 | <i>Centaurea cyanus</i> L.                                      | A | Asteraceae     | 0 | 0 | 0 | 0 | 0 | 0 | no |
| 301 | DS | SK | 11 | <i>Chenopodium album</i> L.                                     | A | Amaranthaceae  | 0 | 0 | 0 | 0 | 0 | 0 | no |
| 302 | DS | SK | 12 | <i>Setaria pumila</i> (Poir.) Roem.& Schult.                    | A | Poaceae        | 1 | 0 | 0 | 0 | 0 | 1 | no |
| 303 | DS | SK | 13 | <i>Viola arvensis</i> Murray                                    | A | Violaceae      | 1 | 0 | 0 | 0 | 0 | 1 | no |
| 304 | DS | SK | 14 | <i>Thlaspi arvense</i> L.                                       | A | Brassicaceae   | 0 | 0 | 0 | 0 | 0 | 0 | no |

Table S2

|     |    |    |    |                                                                 |   |                |   |   |   |   |   |   |     |
|-----|----|----|----|-----------------------------------------------------------------|---|----------------|---|---|---|---|---|---|-----|
| 305 | DS | SK | 15 | <i>Matricaria maritima</i> L. subsp. <i>inodora</i> (L.) Dostal | P | Asteraceae     | 0 | 0 | 0 | 0 | 0 | 0 | no  |
| 306 | DS | SK | 16 | <i>Veronica arvensis</i> L.                                     | A | Plantaginaceae | 0 | 1 | 0 | 0 | 0 | 1 | no  |
| 307 | DS | SK | 17 | <i>Galinsoga parviflora</i> Cav.                                | A | Asteraceae     | 0 | 0 | 0 | 0 | 0 | 0 | no  |
| 308 | DS | SK | 18 | <i>Myosotis arvensis</i> (L.) Hill.                             | A | Boraginaceae   | 1 | 0 | 0 | 0 | 0 | 1 | no  |
| 309 | DS | SK | 19 | <i>Chenopodium album</i> L.                                     | A | Amaranthaceae  | 1 | 0 | 0 | 0 | 0 | 1 | no  |
| 310 | DS | SK | 20 | <i>Galinsoga parviflora</i> Cav.                                | A | Asteraceae     | 1 | 0 | 0 | 0 | 0 | 1 | no  |
| 311 | DS | SK | 21 | <i>Anchusa arvensis</i> (L.) M. Bieb.                           | A | Boraginaceae   | 0 | 0 | 0 | 0 | 0 | 0 | no  |
| 312 | DS | SK | 22 | <i>Barbarea vulgaris</i> R. Br.                                 | P | Brassicaceae   | 0 | 0 | 0 | 0 | 0 | 0 | no  |
| 313 | DS | SM | 2  | <i>Chenopodium album</i> L.                                     | A | Amaranthaceae  | 1 | 0 | 0 | 0 | 0 | 1 | no  |
| 314 | DS | SM | 3  | <i>Echinochloa crus-gali</i> (L.) P. Beauv.                     | A | Poaceae        | 0 | 0 | 0 | 0 | 0 | 0 | no  |
| 315 | DS | SM | 4  | <i>Solanum nigrum</i> L. emend Mill.                            | A | Solanaceae     | 0 | 0 | 0 | 0 | 0 | 0 | no  |
| 316 | DS | SM | 6  | <i>Viola arvensis</i> Murray                                    | A | Violaceae      | 0 | 1 | 0 | 0 | 0 | 1 | no  |
| 317 | DS | SM | 7  | <i>Polygonum lapathifolium</i> ssp. <i>lapathifolium</i>        | A | Polygonaceae   | 0 | 1 | 0 | 0 | 0 | 1 | no  |
| 318 | DS | SM | 8  | <i>Polygonum persicaria</i> L.                                  | A | Polygonaceae   | 0 | 1 | 0 | 0 | 0 | 1 | no  |
| 319 | DS | SM | 9  | <i>Solanum nigrum</i> L. emend Mill.                            | A | Solanaceae     | 0 | 0 | 0 | 0 | 0 | 0 | no  |
| 320 | DS | SM | 10 | <i>Centaurea cyanus</i> L.                                      | A | Asteraceae     | 0 | 0 | 0 | 0 | 0 | 0 | no  |
| 321 | DS | SM | 11 | <i>Matricaria maritima</i> L. subsp. <i>inodora</i> (L.) Dostal | P | Asteraceae     | 0 | 1 | 0 | 0 | 0 | 1 | no  |
| 322 | DS | SM | 12 | <i>Polygonum lapathifolium</i> ssp. <i>lapathifolium</i>        | A | Polygonaceae   | 0 | 1 | 0 | 0 | 0 | 1 | no  |
| 323 | DS | SM | 13 | <i>Echinochloa crus-gali</i> (L.) P. Beauv.                     | A | Poaceae        | 0 | 0 | 0 | 0 | 0 | 0 | no  |
| 324 | DS | SM | 14 | <i>Solanum nigrum</i> L. emend Mill.                            | A | Solanaceae     | 0 | 0 | 0 | 0 | 0 | 0 | no  |
| 325 | DS | SM | 15 | <i>Capsella bursa-pastoris</i> (L.) Medik                       | A | Brassicaceae   | 0 | 0 | 0 | 0 | 0 | 0 | no  |
| 326 | DS | SM | 16 | <i>Sisymbrium officinale</i> (L.) Scop.                         | A | Brassicaceae   | 0 | 1 | 0 | 0 | 0 | 1 | no  |
| 327 | DS | SM | 17 | <i>Matricaria maritima</i> L. subsp. <i>inodora</i> (L.) Dostal | P | Asteraceae     | 1 | 0 | 0 | 0 | 0 | 1 | no  |
| 328 | DS | SM | 18 | <i>Sisymbrium officinale</i> (L.) Scop.                         | A | Brassicaceae   | 0 | 0 | 0 | 0 | 0 | 0 | no  |
| 329 | DS | SM | 19 | <i>Anchusa arvensis</i> (L.) M. Bieb.                           | A | Boraginaceae   | 0 | 1 | 0 | 0 | 0 | 1 | no  |
| 330 | DS | SM | 20 | <i>Galinsoga parviflora</i> Cav.                                | A | Asteraceae     | 1 | 0 | 0 | 0 | 0 | 1 | no  |
| 331 | DS | SM | 21 | <i>Brassica napus</i> L. subsp. <i>napus</i>                    | P | Brassicaceae   | 0 | 0 | 0 | 0 | 1 | 1 | no  |
| 332 | DS | SM | 22 | <i>Echinochloa crus-gali</i> (L.) P. Beauv.                     | A | Poaceae        | 0 | 1 | 0 | 0 | 0 | 1 | no  |
| 333 | DS | SM | 23 | <i>Viola arvensis</i> Murray                                    | A | Violaceae      | 0 | 1 | 0 | 0 | 0 | 1 | no  |
| 334 | DS | SM | 24 | <i>Vicia cracca</i> L.                                          | P | Fabaceae       | 0 | 1 | 0 | 0 | 0 | 1 | no  |
| 335 | SK | LY | 1  | <i>Avena fatua</i> L.                                           | A | Poaceae        | 0 | 0 | 0 | 0 | 0 | 0 | no  |
| 336 | SK | LY | 2  | <i>Echinochloa crus-gali</i> (L.) P. Beauv.                     | A | Poaceae        | 0 | 0 | 0 | 0 | 1 | 1 | no  |
| 337 | SK | LY | 3  | <i>Galinsoga parviflora</i> Cav.                                | A | Asteraceae     | 1 | 0 | 0 | 1 | 0 | 2 | no  |
| 338 | SK | LY | 4  | <i>Sonchus oleraceus</i> L.                                     | A | Asteraceae     | 1 | 1 | 1 | 1 | 1 | 5 | yes |
| 339 | SK | LY | 5  | <i>Capsella bursa-pastoris</i> (L.) Medik                       | A | Brassicaceae   | 0 | 0 | 0 | 0 | 0 | 0 | no  |

Table S2

|     |    |    |    |                                                                 |   |                       |   |   |   |   |   |   |    |
|-----|----|----|----|-----------------------------------------------------------------|---|-----------------------|---|---|---|---|---|---|----|
| 340 | SK | LY | 6  | <i>Polygonum persicaria</i> L.                                  | A | <i>Polygonaceae</i>   | 0 | 0 | 0 | 0 | 0 | 0 | no |
| 341 | SK | LY | 7  | <i>Trifolium pratense</i> L.                                    | P | <i>Fabaceae</i>       | 1 | 0 | 0 | 1 | 0 | 2 | no |
| 342 | SK | LY | 8  | <i>Galeopsis tetrahit</i> L.                                    | A | <i>Lamiaceae</i>      | 0 | 0 | 0 | 0 | 0 | 0 | no |
| 343 | SK | LY | 9  | <i>Convolvulus arvensis</i> L.                                  | P | <i>Convolvulaceae</i> | 0 | 0 | 0 | 0 | 0 | 0 | no |
| 344 | SK | LY | 10 | <i>Anagalis arvensis</i> L.                                     | A | <i>Primulaceae</i>    | 1 | 0 | 0 | 0 | 0 | 1 | no |
| 345 | SK | LY | 11 | <i>Chenopodium album</i> L.                                     | A | <i>Amaranthaceae</i>  | 0 | 0 | 0 | 0 | 0 | 0 | no |
| 346 | SK | LY | 12 | <i>Amaranthus retroflexus</i> L.                                | A | <i>Amaranthaceae</i>  | 0 | 0 | 0 | 0 | 0 | 0 | no |
| 347 | SK | LY | 13 | <i>Fallopia convolvulus</i> (L.) Á. Löve                        | A | <i>Polygonaceae</i>   | 0 | 0 | 0 | 0 | 0 | 0 | no |
| 348 | SK | LY | 14 | <i>Fumaria officinalis</i> L.                                   | A | <i>Papaveraceae</i>   | 0 | 0 | 0 | 0 | 0 | 0 | no |
| 349 | SK | LY | 15 | <i>Sinapis arvensis</i> L.                                      | A | <i>Brassicaceae</i>   | 0 | 0 | 0 | 0 | 0 | 0 | no |
| 350 | SK | LY | 16 | <i>Myosotis arvensis</i> (L.) Hill.                             | A | <i>Boraginaceae</i>   | 1 | 0 | 0 | 0 | 0 | 1 | no |
| 351 | SK | LY | 17 | <i>Myosotis arvensis</i> (L.) Hill.                             | A | <i>Boraginaceae</i>   | 1 | 0 | 0 | 0 | 0 | 1 | no |
| 352 | SK | LY | 18 | <i>Cirsium arvense</i> (L.) Scop.                               | P | <i>Asteraceae</i>     | 0 | 0 | 0 | 0 | 0 | 0 | no |
| 353 | SK | LY | 19 | <i>Poa annua</i> L.                                             | A | <i>Poaceae</i>        | 0 | 0 | 0 | 0 | 0 | 0 | no |
| 354 | SK | LY | 20 | <i>Setaria viridis</i> (L.) P.B.                                | A | <i>Poaceae</i>        | 0 | 0 | 0 | 0 | 0 | 0 | no |
| 355 | SK | LY | 21 | <i>Matricaria maritima</i> L. subsp. <i>inodora</i> (L.) Dostal | P | <i>Asteraceae</i>     | 0 | 0 | 0 | 0 | 0 | 0 | no |
| 356 | SK | LY | 22 | <i>Teraxacum officinale</i> F.H. Wigg.                          | P | <i>Asteraceae</i>     | 1 | 0 | 0 | 1 | 1 | 3 | no |
| 357 | SK | LY | 23 | <i>Trifolium</i> sp.                                            | P | <i>Fabaceae</i>       | 0 | 0 | 0 | 0 | 0 | 0 | no |
| 358 | SK | LY | 24 | <i>Fumaria officinalis</i> L.                                   | A | <i>Papaveraceae</i>   | 0 | 0 | 0 | 0 | 0 | 0 | no |
| 359 | SK | LY | 25 | <i>Polygonum lapathifolium</i> ssp. <i>lapathifolium</i>        | A | <i>Polygonaceae</i>   | 0 | 0 | 0 | 0 | 0 | 0 | no |
| 360 | SK | LY | 26 | <i>Polygonum lapathifolium</i> ssp. <i>lapathifolium</i>        | A | <i>Polygonaceae</i>   | 0 | 0 | 0 | 0 | 0 | 0 | no |
| 361 | SK | LY | 27 | <i>Geranium pusillum</i> Burm. F. ex. L.                        | A | <i>Geraniaceae</i>    | 0 | 0 | 0 | 0 | 0 | 0 | no |
| 362 | SK | LY | 28 | <i>Veronica arvensis</i> L.                                     | A | <i>Plantaginaceae</i> | 0 | 0 | 0 | 0 | 0 | 0 | no |
| 363 | SK | LY | 29 | <i>Polygonum lapathifolium</i> ssp. <i>lapathifolium</i>        | A | <i>Polygonaceae</i>   | 0 | 0 | 0 | 0 | 0 | 0 | no |
| 364 | SK | LY | 30 | <i>Fallopia convolvulus</i> (L.) Á. Löve                        | A | <i>Polygonaceae</i>   | 0 | 0 | 0 | 0 | 0 | 0 | no |
| 365 | SK | LY | 31 | <i>Cirsium arvense</i> (L.) Scop.                               | P | <i>Asteraceae</i>     | 1 | 0 | 0 | 0 | 0 | 1 | no |
| 366 | SK | LY | 32 | <i>Chenopodium album</i> L.                                     | A | <i>Amaranthaceae</i>  | 0 | 0 | 0 | 0 | 0 | 0 | no |
| 367 | SK | LY | 33 | <i>Chenopodium album</i> L.                                     | A | <i>Amaranthaceae</i>  | 0 | 0 | 0 | 0 | 0 | 0 | no |
| 368 | SK | LY | 34 | <i>Chenopodium album</i> L.                                     | A | <i>Amaranthaceae</i>  | 1 | 0 | 0 | 0 | 0 | 1 | no |
| 369 | SK | LY | 35 | <i>Viola arvensis</i> Murray                                    | A | <i>Violaceae</i>      | 0 | 0 | 0 | 0 | 0 | 0 | no |
| 370 | SK | LY | 36 | <i>Sinapis arvensis</i> L.                                      | A | <i>Brassicaceae</i>   | 0 | 0 | 0 | 0 | 0 | 0 | no |
| 371 | SK | LY | 37 | <i>Matricaria maritima</i> L. subsp. <i>inodora</i> (L.) Dostal | P | <i>Asteraceae</i>     | 0 | 0 | 0 | 0 | 0 | 0 | no |
| 372 | SK | LY | 38 | <i>Viola arvensis</i> Murray                                    | A | <i>Violaceae</i>      | 0 | 0 | 0 | 0 | 0 | 0 | no |
| 373 | SK | LY | 39 | <i>Polygonum lapathifolium</i> ssp. <i>lapathifolium</i>        | A | <i>Polygonaceae</i>   | 0 | 0 | 0 | 0 | 0 | 0 | no |
| 374 | SK | LY | 40 | <i>Polygonum lapathifolium</i> ssp. <i>lapathifolium</i>        | A | <i>Polygonaceae</i>   | 0 | 0 | 0 | 0 | 0 | 0 | no |

Table S2

|     |    |    |    |                                                                 |   |                |   |   |   |   |   |   |    |
|-----|----|----|----|-----------------------------------------------------------------|---|----------------|---|---|---|---|---|---|----|
| 375 | SK | LY | 41 | <i>Fallopia convolvulus</i> (L.) Á. Löve                        | A | Polygonaceae   | 0 | 0 | 0 | 0 | 0 | 0 | no |
| 376 | SK | LY | 42 | <i>Cirsium arvense</i> (L.) Scop.                               | P | Asteraceae     | 0 | 0 | 0 | 0 | 0 | 0 | no |
| 377 | SK | LY | 43 | <i>Amaranthus retroflexus</i> L.                                | A | Amaranthaceae  | 0 | 0 | 0 | 0 | 0 | 0 | no |
| 378 | SK | LY | 44 | <i>Fumaria officinalis</i> L.                                   | A | Papaveraceae   | 0 | 0 | 0 | 0 | 0 | 0 | no |
| 379 | SK | LY | 45 | <i>Polygonum persicaria</i> L.                                  | A | Polygonaceae   | 0 | 0 | 0 | 0 | 0 | 0 | no |
| 380 | SK | LY | 46 | <i>Fumaria officinalis</i> L.                                   | A | Papaveraceae   | 0 | 0 | 0 | 0 | 0 | 0 | no |
| 381 | SK | LY | 47 | <i>Myosotis arvensis</i> (L.) Hill.                             | A | Boraginaceae   | 1 | 0 | 0 | 0 | 0 | 1 | no |
| 382 | SK | LY | 48 | <i>Matricaria maritima</i> L. subsp. <i>inodora</i> (L.) Dostal | P | Asteraceae     | 0 | 0 | 0 | 0 | 0 | 0 | no |
| 383 | SK | LY | 49 | <i>Galinsoga parviflora</i> Cav.                                | A | Asteraceae     | 1 | 0 | 0 | 0 | 0 | 1 | no |
| 384 | SK | LY | 50 | <i>Chenopodium album</i> L.                                     | A | Amaranthaceae  | 0 | 0 | 0 | 0 | 0 | 0 | no |
| 385 | SK | LY | 51 | <i>Cirsium arvense</i> (L.) Scop.                               | P | Asteraceae     | 0 | 0 | 0 | 0 | 0 | 0 | no |
| 386 | SK | LY | 52 | <i>Veronica arvensis</i> L.                                     | A | Plantaginaceae | 0 | 0 | 0 | 0 | 0 | 0 | no |
| 387 | SK | LY | 53 | <i>Veronica persica</i> Poir.                                   | A | Plantaginaceae | 0 | 0 | 0 | 0 | 0 | 0 | no |
| 388 | SK | LY | 54 | <i>Euphorbia helioscopia</i> L.                                 | A | Euphorbiaceae  | 0 | 0 | 0 | 0 | 0 | 0 | no |
| 389 | SK | LY | 55 | <i>Chenopodium hybridum</i> L.                                  | A | Amaranthaceae  | 0 | 0 | 0 | 0 | 0 | 0 | no |
| 390 | SK | LY | 56 | <i>Plantago major</i> L.                                        | P | Plantaginaceae | 0 | 0 | 0 | 0 | 0 | 0 | no |
| 391 | SK | LY | 57 | <i>Fumaria officinalis</i> L.                                   | A | Papaveraceae   | 0 | 0 | 0 | 0 | 0 | 0 | no |
| 392 | SK | LY | 58 | <i>Chenopodium album</i> L.                                     | A | Amaranthaceae  | 0 | 0 | 0 | 1 | 0 | 1 | no |
| 393 | SK | LY | 59 | <i>Centaurea cyanus</i> L.                                      | A | Asteraceae     | 0 | 0 | 0 | 0 | 0 | 0 | no |
| 394 | SK | LY | 60 | <i>Raphanus raphanistrum</i> L.                                 | A | Brassicaceae   | 0 | 0 | 0 | 0 | 0 | 0 | no |
| 395 | SK | LY | 61 | <i>Euphorbia helioscopia</i> L.                                 | A | Euphorbiaceae  | 0 | 0 | 0 | 0 | 0 | 0 | no |
| 396 | SK | LY | 62 | <i>Amaranthus retroflexus</i> L.                                | A | Amaranthaceae  | 0 | 0 | 0 | 0 | 0 | 0 | no |
| 397 | SK | LY | 63 | <i>Polygonum lapathifolium</i> ssp. <i>lapathifolium</i>        | A | Polygonaceae   | 0 | 0 | 0 | 0 | 0 | 0 | no |
| 398 | SK | LY | 64 | <i>Galium aparine</i> L.                                        | A | Rubiaceae      | 0 | 0 | 0 | 0 | 0 | 0 | no |
| 399 | SK | LY | 65 | <i>Fallopia convolvulus</i> (L.) Á. Löve                        | A | Polygonaceae   | 0 | 0 | 0 | 0 | 0 | 0 | no |
| 400 | SK | LY | 66 | <i>Veronica persica</i> Poir.                                   | A | Plantaginaceae | 0 | 0 | 0 | 0 | 0 | 0 | no |
| 401 | SK | ME | 1  | <i>Achillea pannonica</i> Scheele                               | P | Asteraceae     | 0 | 0 | 0 | 0 | 0 | 0 | no |
| 402 | SK | ME | 1  | <i>Brassica rapa</i>                                            | A | Brassicaceae   | 0 | 0 | 0 | 0 | 0 | 0 | no |
| 403 | SK | ME | 1  | <i>Solanum tuberosum</i> L.                                     | P | Solanaceae     | 0 | 0 | 0 | 0 | 0 | 0 | no |
| 404 | SK | ME | 2  | <i>Galium aparine</i> L.                                        | A | Rubiaceae      | 0 | 0 | 0 | 0 | 0 | 0 | no |
| 405 | SK | ME | 3  | <i>Falcaria vulgaris</i> Bernh.                                 | P | Apiaceae       | 0 | 0 | 0 | 0 | 0 | 0 | no |
| 406 | SK | ME | 4  | <i>Consolida regalis</i> Gray                                   | A | Ranunculaceae  | 0 | 0 | 0 | 0 | 0 | 0 | no |
| 407 | SK | ME | 5  | <i>Cirsium arvense</i> (L.) Scop.                               | P | Asteraceae     | 0 | 0 | 0 | 0 | 0 | 0 | no |
| 408 | SK | ME | 6  | <i>Lactuca serriola</i> L.                                      | P | Asteraceae     | 1 | 0 | 0 | 1 | 0 | 2 | no |
| 409 | SK | ME | 7  | <i>Vicia tetrasperma</i> (L.) Schreb.                           | A | Fabaceae       | 0 | 0 | 0 | 0 | 0 | 0 | no |

Table S2

|     |    |    |    |                                                                 |   |                 |   |   |   |   |   |   |    |
|-----|----|----|----|-----------------------------------------------------------------|---|-----------------|---|---|---|---|---|---|----|
| 410 | SK | ME | 8  | <i>Galeopsis tetrahit</i> L.                                    | A | Lamiaceae       | 0 | 0 | 0 | 0 | 0 | 0 | no |
| 411 | SK | ME | 9  | <i>Convolvulus arvensis</i> L.                                  | P | Convolvulaceae  | 0 | 0 | 0 | 0 | 0 | 0 | no |
| 412 | SK | ME | 10 | <i>Lathyrus tuberosus</i> L.                                    | P | Fabaceae        | 0 | 0 | 0 | 0 | 0 | 0 | no |
| 413 | SK | ME | 11 | <i>Chenopodium album</i> L.                                     | A | Amaranthaceae   | 0 | 0 | 0 | 0 | 0 | 0 | no |
| 414 | SK | ME | 12 | <i>Melandrium album</i> (Mill.) Garcke                          | P | Caryophyllaceae | 0 | 0 | 0 | 0 | 0 | 0 | no |
| 415 | SK | ME | 13 | <i>Papaver rhoeas</i> L.                                        | A | Papaveraceae    | 0 | 0 | 0 | 0 | 0 | 0 | no |
| 416 | SK | ME | 14 | <i>Avena fatua</i> L.                                           | A | Poaceae         | 0 | 0 | 0 | 0 | 0 | 0 | no |
| 417 | SK | ME | 15 | <i>Setaria pumila</i> (Poir.) Roem.& Schult.                    | A | Poaceae         | 0 | 0 | 0 | 0 | 0 | 0 | no |
| 418 | SK | ME | 16 | <i>Neslia paniculata</i> (L.) Desv.                             | A | Brassicaceae    | 0 | 0 | 0 | 0 | 0 | 0 | no |
| 419 | SK | ME | 17 | <i>Capsella bursa-pastoris</i> (L.) Medik                       | A | Brassicaceae    | 0 | 0 | 0 | 0 | 0 | 0 | no |
| 420 | SK | ME | 18 | <i>Echinochloa crus-gali</i> (L.) P. Beauv.                     | A | Poaceae         | 0 | 0 | 0 | 0 | 0 | 0 | no |
| 421 | SK | ME | 19 | <i>Setaria pumila</i> (Poir.) Roem.& Schult.                    | A | Poaceae         | 0 | 0 | 0 | 0 | 0 | 0 | no |
| 422 | SK | ME | 20 | <i>Matricaria maritima</i> L. subsp. <i>inodora</i> (L.) Dostal | P | Asteraceae      | 0 | 0 | 0 | 0 | 0 | 0 | no |
| 423 | SK | ME | 21 | <i>Equisetum arvense</i> L.                                     | P | Equisetaceae    | 0 | 0 | 0 | 0 | 0 | 0 | no |
| 424 | SK | ME | 22 | <i>Chenopodium album</i> L.                                     | A | Amaranthaceae   | 0 | 0 | 0 | 0 | 0 | 0 | no |
| 425 | SK | ME | 23 | <i>Cirsium arvense</i> (L.) Scop.                               | P | Asteraceae      | 0 | 0 | 0 | 0 | 0 | 0 | no |
| 426 | SK | ME | 24 | <i>Polygonum persicaria</i> L.                                  | A | Polygonaceae    | 0 | 0 | 0 | 0 | 0 | 0 | no |
| 427 | SK | ME | 25 | <i>Convolvulus arvensis</i> L.                                  | P | Convolvulaceae  | 0 | 0 | 0 | 0 | 0 | 0 | no |
| 428 | SK | ME | 26 | <i>Galinsoga parviflora</i> Cav.                                | A | Asteraceae      | 1 | 0 | 0 | 0 | 0 | 1 | no |
| 429 | SK | ME | 27 | <i>Galinsoga ciliata</i> (Raf.) S.F. Blake                      | A | Asteraceae      | 0 | 0 | 0 | 0 | 0 | 0 | no |
| 430 | SK | ME | 28 | <i>Amaranthus retroflexus</i> L.                                | A | Amaranthaceae   | 0 | 0 | 0 | 0 | 0 | 0 | no |
| 431 | SK | ME | 29 | <i>Sonchus</i> sp.                                              | P | Asteraceae      | 1 | 0 | 0 | 1 | 0 | 2 | no |
| 432 | SK | ME | 30 | <i>Plantago major</i> L.                                        | P | Plantaginaceae  | 0 | 0 | 0 | 0 | 0 | 0 | no |
| 433 | SK | ME | 31 | <i>Euphorbia helioscopia</i> L.                                 | A | Euphorbiaceae   | 0 | 0 | 0 | 0 | 0 | 0 | no |
| 434 | SK | ME | 32 | <i>Euphorbia helioscopia</i> L.                                 | A | Euphorbiaceae   | 0 | 0 | 0 | 0 | 0 | 0 | no |
| 435 | SK | ME | 33 | <i>Veronica persica</i> Poir.                                   | A | Plantaginaceae  | 0 | 0 | 0 | 0 | 0 | 0 | no |
| 436 | SK | ME | 34 | <i>Anagalis arvensis</i> L.                                     | A | Primulaceae     | 0 | 0 | 0 | 0 | 0 | 0 | no |
| 437 | SK | ME | 35 | <i>Viola arvensis</i> Murray                                    | A | Violaceae       | 0 | 0 | 0 | 0 | 0 | 0 | no |
| 438 | SK | ME | 36 | <i>Sinapis arvensis</i> L.                                      | A | Brassicaceae    | 0 | 0 | 0 | 0 | 0 | 0 | no |
| 439 | SK | ME | 37 | <i>Artemisia vulgaris</i> L.                                    | P | Asteraceae      | 1 | 0 | 0 | 0 | 0 | 1 | no |
| 440 | SK | ME | 38 | <i>Convolvulus arvensis</i> L.                                  | P | Convolvulaceae  | 0 | 0 | 0 | 0 | 0 | 0 | no |
| 441 | SK | ME | 39 | <i>Polygonum lapathifolium</i> ssp. <i>lapathifolium</i>        | A | Polygonaceae    | 0 | 0 | 0 | 0 | 0 | 0 | no |
| 442 | SK | ME | 40 | <i>Lamium purpureum</i> L.                                      | A | Lamiaceae       | 1 | 0 | 0 | 0 | 0 | 1 | no |
| 443 | SK | ME | 41 | <i>Chenopodium album</i> L.                                     | A | Amaranthaceae   | 0 | 0 | 0 | 0 | 0 | 0 | no |
| 444 | SK | ME | 42 | <i>Melandrium album</i> (Mill.) Garcke                          | P | Caryophyllaceae | 1 | 0 | 0 | 0 | 0 | 1 | no |

Table S2

|     |    |    |     |                                                       |   |                 |   |   |   |   |   |   |    |
|-----|----|----|-----|-------------------------------------------------------|---|-----------------|---|---|---|---|---|---|----|
| 445 | SK | ME | 23a | <i>Geranium pusillum</i> Burm. F. ex. L.              | A | Geraniaceae     | 0 | 0 | 0 | 0 | 0 | 0 | no |
| 446 | SK | WL | 1   | <i>Sinapis arvensis</i> L.                            | A | Brassicaceae    | 0 | 0 | 0 | 0 | 0 | 0 | no |
| 447 | SK | WL | 1   | <i>Solanum tuberosum</i> L.                           | P | Solanaceae      | 0 | 0 | 0 | 0 | 0 | 0 | no |
| 448 | SK | WL | 2   | <i>Pimpinella saxifraga</i> L.                        | P | Apiaceae        | 0 | 0 | 0 | 0 | 0 | 0 | no |
| 449 | SK | WL | 2   | <i>Cucurbita pepo</i> L.                              | A | Cucurbitaceae   | 1 | 0 | 0 | 0 | 0 | 1 | no |
| 450 | SK | WL | 3   | <i>Setaria viridis</i> (L.) P.B.                      | A | Poaceae         | 0 | 0 | 0 | 0 | 0 | 0 | no |
| 451 | SK | WL | 4   | <i>Silene vulgaris</i> (Salisb.) Sm.                  | P | Caryophyllaceae | 0 | 0 | 0 | 0 | 0 | 0 | no |
| 452 | SK | WL | 5   | <i>Polygonum persicaria</i> L.                        | A | Polygonaceae    | 0 | 0 | 0 | 0 | 0 | 0 | no |
| 453 | SK | WL | 6   | <i>Chenopodium album</i> L.                           | A | Amaranthaceae   | 0 | 0 | 0 | 0 | 0 | 0 | no |
| 454 | SK | WL | 7   | <i>Viola arvensis</i> Murray                          | A | Violaceae       | 0 | 0 | 0 | 0 | 0 | 0 | no |
| 455 | SK | WL | 8   | <i>Galium aparine</i> L.                              | A | Rubiaceae       | 0 | 0 | 0 | 0 | 0 | 0 | no |
| 456 | SK | WL | 9   | <i>Galinsoga parviflora</i> Cav.                      | A | Asteraceae      | 1 | 0 | 0 | 1 | 0 | 2 | no |
| 457 | SK | WL | 10  | <i>Fallopia convolvulus</i> (L.) Á. Löve              | A | Polygonaceae    | 0 | 0 | 0 | 0 | 0 | 0 | no |
| 458 | SK | WL | 11  | <i>Capsella bursa-pastoris</i> (L.) Medik             | A | Brassicaceae    | 0 | 0 | 0 | 0 | 0 | 0 | no |
| 459 | SK | WL | 12  | <i>Convolvulus arvensis</i> L.                        | P | Convolvulaceae  | 0 | 0 | 0 | 0 | 0 | 0 | no |
| 460 | SK | WL | 13  | <i>Setaria viridis</i> (L.) P.B.                      | A | Poaceae         | 0 | 0 | 0 | 0 | 0 | 0 | no |
| 461 | SK | WL | 14  | <i>Veronica persica</i> Poir.                         | A | Plantaginaceae  | 0 | 0 | 0 | 0 | 0 | 0 | no |
| 462 | SK | WL | 15  | <i>Amaranthus retroflexus</i> L.                      | A | Amaranthaceae   | 0 | 0 | 0 | 0 | 0 | 0 | no |
| 463 | SK | WL | 16  | <i>Malva neglecta</i> L.                              | P | Malvaceae       | 0 | 0 | 0 | 0 | 0 | 0 | no |
| 464 | SK | WL | 17  | <i>Papaver rhoeas</i> L.                              | A | Papaveraceae    | 0 | 0 | 0 | 0 | 0 | 0 | no |
| 465 | SK | WL | 18  | <i>Achillea millefolium</i> L.                        | P | Asteraceae      | 0 | 0 | 0 | 0 | 0 | 0 | no |
| 466 | SK | WL | 19  | <i>Consolida regalis</i> Gray                         | A | Ranunculaceae   | 0 | 0 | 0 | 0 | 0 | 0 | no |
| 467 | SK | WL | 20  | <i>Centaurea cyanus</i> L.                            | A | Asteraceae      | 0 | 0 | 0 | 0 | 0 | 0 | no |
| 468 | SK | WL | 21  | <i>Polygonum persicaria</i> L.                        | A | Polygonaceae    | 0 | 0 | 0 | 0 | 0 | 0 | no |
| 469 | SK | WL | 22  | <i>Convolvulus arvensis</i> L.                        | P | Convolvulaceae  | 0 | 0 | 0 | 0 | 0 | 0 | no |
| 470 | SK | WL | 23  | <i>Geranium pusillum</i> Burm. F. ex. L.              | A | Geraniaceae     | 0 | 0 | 0 | 0 | 0 | 0 | no |
| 471 | SK | WL | 24  | <i>Vicia cracca</i> L.                                | P | Fabaceae        | 0 | 0 | 0 | 0 | 0 | 0 | no |
| 472 | SK | WL | 25  | <i>Lotus corniculatus</i>                             | P | Fabaceae        | 0 | 0 | 0 | 0 | 0 | 0 | no |
| 473 | SK | WL | 26  | <i>Armoracia rusticana</i> P. Gaertn. B. Mey & Schab. | P | Brassicaceae    | 0 | 0 | 0 | 0 | 0 | 0 | no |
| 474 | SK | WL | 27  | <i>Echinochloa crus-gali</i> (L.) P. Beauv.           | A | Poaceae         | 0 | 0 | 0 | 0 | 1 | 1 | no |
| 475 | SK | WL | 28  | <i>Setaria viridis</i> (L.) P.B.                      | A | Poaceae         | 0 | 0 | 0 | 0 | 0 | 0 | no |
| 476 | SK | WL | 29  | <i>Galinsoga parviflora</i> Cav.                      | A | Asteraceae      | 1 | 0 | 0 | 1 | 0 | 2 | no |
| 477 | SK | WL | 30  | <i>Galinsoga ciliata</i> (Raf.) S.F. Blake            | A | Asteraceae      | 1 | 0 | 0 | 1 | 0 | 2 | no |
| 478 | SK | WL | 31  | <i>Plantago major</i> L.                              | P | Plantaginaceae  | 0 | 0 | 0 | 0 | 0 | 0 | no |
| 479 | SK | WL | 32  | <i>Capsella bursa-pastoris</i> (L.) Medik             | A | Brassicaceae    | 0 | 0 | 0 | 0 | 0 | 0 | no |

Table S2

|     |    |     |    |                                                                 |   |                |   |   |   |   |   |   |     |
|-----|----|-----|----|-----------------------------------------------------------------|---|----------------|---|---|---|---|---|---|-----|
| 480 | SK | WL  | 33 | <i>Amaranthus retroflexus</i> L.                                | A | Amaranthaceae  | 0 | 0 | 0 | 0 | 0 | 0 | no  |
| 481 | SK | WL  | 34 | <i>Viola arvensis</i> Murray                                    | A | Violaceae      | 0 | 0 | 0 | 0 | 0 | 0 | no  |
| 482 | SK | WL  | 35 | <i>Chenopodium album</i> L.                                     | A | Amaranthaceae  | 0 | 0 | 0 | 0 | 0 | 0 | no  |
| 483 | SK | WL  | 36 | <i>Euphorbia helioscopia</i> L.                                 | A | Euphorbiaceae  | 0 | 0 | 0 | 0 | 0 | 0 | no  |
| 484 | SK | WL  | 37 | <i>Capsella bursa-pastoris</i> (L.) Medik                       | A | Brassicaceae   | 0 | 0 | 0 | 0 | 0 | 0 | no  |
| 485 | SK | WL  | 38 | <i>Plantago major</i> L.                                        | P | Plantaginaceae | 0 | 0 | 0 | 0 | 0 | 0 | no  |
| 486 | SK | WL  | 39 | <i>Veronica persica</i> Poir.                                   | A | Plantaginaceae | 0 | 0 | 0 | 0 | 0 | 0 | no  |
| 487 | SK | WL  | 40 | <i>Rorippa sylvestris</i> (L.) Besser                           | P | Brassicaceae   | 1 | 0 | 0 | 0 | 0 | 1 | no  |
| 488 | SK | WL  | 41 | <i>Fallopia convolvulus</i> (L.) Á. Löve                        | A | Polygonaceae   | 0 | 0 | 0 | 0 | 0 | 0 | no  |
| 489 | SK | WL  | 42 | <i>Convolvulus arvensis</i> L.                                  | P | Convolvulaceae | 0 | 0 | 0 | 0 | 0 | 0 | no  |
| 490 | SK | WL  | 43 | <i>Chenopodium hybridum</i> L.                                  | A | Amaranthaceae  | 0 | 0 | 0 | 0 | 0 | 0 | no  |
| 491 | SK | WL  | 44 | <i>Polygonum lapathifolium</i> ssp. <i>lapathifolium</i>        | A | Polygonaceae   | 1 | 0 | 0 | 1 | 0 | 2 | no  |
| 492 | SK | WL  | 45 | <i>Amaranthus retroflexus</i> L.                                | A | Amaranthaceae  | 0 | 0 | 0 | 0 | 0 | 0 | no  |
| 493 | SK | WL  | 46 | <i>Capsella bursa-pastoris</i> (L.) Medik                       | A | Brassicaceae   | 0 | 0 | 0 | 0 | 0 | 0 | no  |
| 494 | SK | WL  | 47 | <i>Veronica persica</i> Poir.                                   | A | Plantaginaceae | 1 | 0 | 0 | 0 | 0 | 1 | no  |
| 495 | SK | WL  | 48 | <i>Viola arvensis</i> Murray                                    | A | Violaceae      | 0 | 0 | 0 | 0 | 0 | 0 | no  |
| 496 | SK | WL  | 49 | <i>Anagalis arvensis</i> L.                                     | A | Primulaceae    | 0 | 0 | 0 | 0 | 0 | 0 | no  |
| 497 | SK | WL  | 50 | <i>Sonchus arvensis</i> L.                                      | P | Asteraceae     | 1 | 0 | 0 | 1 | 0 | 2 | no  |
| 498 | LU | C   | 1  | <i>Convolvulus arvensis</i> L.                                  | P | Convolvulaceae | 0 | 1 | 0 | 0 | 0 | 1 | no  |
| 499 | LU | C   | 2  | <i>Chenopodium album</i> L.                                     | A | Amaranthaceae  | 0 | 0 | 0 | 0 | 1 | 1 | no  |
| 500 | LU | C   | 3  | <i>Matricaria maritima</i> L. subsp. <i>inodora</i> (L.) Dostal | P | Asteraceae     | 1 | 1 | 0 | 0 | 0 | 2 | yes |
| 501 | LU | C   | 4  | <i>Chenopodium album</i> L.                                     | A | Amaranthaceae  | 0 | 1 | 0 | 0 | 0 | 1 | no  |
| 502 | LU | C   | 5  | <i>Chenopodium album</i> L.                                     | A | Amaranthaceae  | 0 | 0 | 0 | 0 | 0 | 0 | no  |
| 503 | LU | C   | 6  | <i>Anthemis arvensis</i> L.                                     | A | Asteraceae     | 0 | 1 | 0 | 0 | 0 | 1 | no  |
| 504 | LU | C   | 7  | <i>Anthemis arvensis</i> L.                                     | A | Asteraceae     | 0 | 1 | 0 | 0 | 0 | 1 | no  |
| 505 | LU | D   | 1  | <i>Sinapis arvensis</i> L.                                      | A | Brassicaceae   | 0 | 0 | 0 | 0 | 0 | 0 | no  |
| 506 | LU | D   | 2  | <i>Conyza canadensis</i> (L.)                                   | A | Asteraceae     | 0 | 0 | 0 | 0 | 0 | 0 | no  |
| 507 | LU | D   | 3  | <i>Achillea millefolium</i> L.                                  | P | Asteraceae     | 1 | 0 | 0 | 0 | 0 | 1 | no  |
| 508 | LU | D   | 4  | <i>Galinsoga parviflora</i> Cav.                                | A | Asteraceae     | 1 | 1 | 0 | 0 | 0 | 2 | yes |
| 509 | LU | K   | 1  | <i>Chenopodium album</i> L.                                     | A | Amaranthaceae  | 0 | 0 | 0 | 0 | 1 | 1 | no  |
| 510 | LU | K   | 2  | <i>Galinsoga parviflora</i> Cav.                                | A | Asteraceae     | 0 | 1 | 0 | 0 | 0 | 1 | no  |
| 511 | LU | K   | 3  | <i>Anthemis arvensis</i> L.                                     | A | Asteraceae     | 0 | 1 | 0 | 0 | 0 | 1 | no  |
| 512 | LU | K   | 4  | <i>Galinsoga parviflora</i> Cav.                                | A | Asteraceae     | 0 | 0 | 0 | 0 | 0 | 0 | no  |
| 513 | LU | NA1 | 1  | <i>Plantago major</i> L.                                        | P | Plantaginaceae | 0 | 1 | 0 | 0 | 0 | 1 | no  |
| 514 | LU | NA1 | 2  | <i>Gnaphalium uliginosum</i> L.                                 | A | Asteraceae     | 1 | 1 | 0 | 0 | 0 | 2 | yes |



Table S2

|     |    |     |    |                                                                 |   |                |   |   |   |   |   |   |     |
|-----|----|-----|----|-----------------------------------------------------------------|---|----------------|---|---|---|---|---|---|-----|
| 515 | LU | NA1 | 3  | <i>Barbarea vulgaris</i> R. Br.                                 | P | Brassicaceae   | 1 | 1 | 0 | 0 | 0 | 2 | yes |
| 516 | LU | NA1 | 4  | <i>Capsella bursa-pastoris</i> (L.) Medik                       | A | Brassicaceae   | 1 | 1 | 0 | 0 | 0 | 2 | yes |
| 517 | LU | NA1 | 5  | <i>Equisetum arvense</i> L.                                     | P | Equisetaceae   | 1 | 1 | 0 | 0 | 0 | 2 | yes |
| 518 | LU | NA1 | 6  | <i>Convolvulus arvensis</i> L.                                  | P | Convolvulaceae | 1 | 1 | 0 | 0 | 0 | 2 | yes |
| 519 | LU | NA1 | 7  | <i>Barbarea vulgaris</i> R. Br.                                 | P | Brassicaceae   | 1 | 1 | 0 | 0 | 0 | 2 | yes |
| 520 | LU | NA1 | 8  | <i>Setaria pumila</i> (Poir.) Roem.& Schult.                    | A | Poaceae        | 1 | 1 | 0 | 0 | 1 | 3 | yes |
| 521 | LU | NA1 | 9  | <i>Myosotis arvensis</i> (L.) Hill.                             | A | Boraginaceae   | 1 | 1 | 0 | 0 | 0 | 2 | yes |
| 522 | LU | NA1 | 10 | <i>Myosotis arvensis</i> (L.) Hill.                             | A | Boraginaceae   | 1 | 1 | 0 | 0 | 0 | 2 | yes |
| 523 | LU | NA1 | 11 | <i>Viola arvensis</i> Murray                                    | A | Violaceae      | 0 | 1 | 0 | 0 | 0 | 1 | no  |
| 524 | LU | NA2 | 1  | <i>Cucurbita pepo</i> L.                                        | A | Cucurbitaceae  | 1 | 1 | 0 | 0 | 0 | 2 | yes |
| 525 | LU | NA2 | 1  | <i>Chenopodium album</i> L.                                     | A | Amaranthaceae  | 1 | 1 | 0 | 0 | 0 | 2 | yes |
| 526 | LU | NA2 | 1  | <i>Cucumis</i> sp.                                              | A | Cucurbitaceae  | 1 | 1 | 0 | 0 | 0 | 2 | yes |
| 527 | LU | NA2 | 1  | <i>Helianthus</i> sp.                                           | A | Asteraceae     | 1 | 1 | 0 | 0 | 0 | 2 | yes |
| 528 | LU | NA2 | 1  | <i>Solanum tuberosum</i> L.                                     | P | Solanaceae     | 1 | 1 | 0 | 0 | 0 | 2 | yes |
| 529 | LU | NA2 | 2  | <i>Equisetum arvense</i> L.                                     | P | Equisetaceae   | 0 | 1 | 0 | 0 | 0 | 1 | no  |
| 530 | LU | NA2 | 2  | <i>Helianthus</i> sp.                                           | A | Asteraceae     | 1 | 1 | 0 | 0 | 0 | 2 | yes |
| 531 | LU | NA2 | 3  | <i>Galinsoga ciliata</i> (Raf.) S.F. Blake                      | A | Asteraceae     | 1 | 1 | 0 | 0 | 0 | 2 | yes |
| 532 | LU | NA2 | 4  | <i>Gnaphalium uliginosum</i> L.                                 | A | Asteraceae     | 1 | 1 | 0 | 0 | 0 | 2 | yes |
| 533 | LU | NA2 | 5  | <i>Plantago major</i> L.                                        | P | Plantaginaceae | 0 | 1 | 0 | 0 | 0 | 1 | no  |
| 534 | LU | NA2 | 6  | <i>Chenopodium album</i> L.                                     | A | Amaranthaceae  | 0 | 1 | 0 | 0 | 0 | 1 | no  |
| 535 | LU | NA2 | 7  | <i>Matricaria maritima</i> L. subsp. <i>inodora</i> (L.) Dostal | P | Asteraceae     | 0 | 1 | 0 | 0 | 0 | 1 | no  |
| 536 | LU | NA2 | 8  | <i>Gnaphalium uliginosum</i> L.                                 | A | Asteraceae     | 1 | 1 | 0 | 0 | 0 | 2 | yes |
| 537 | LU | NA2 | 9  | <i>Equisetum arvense</i> L.                                     | P | Equisetaceae   | 0 | 0 | 0 | 0 | 0 | 0 | no  |
| 538 | LU | NA2 | 10 | <i>Plantago major</i> L.                                        | P | Plantaginaceae | 0 | 1 | 0 | 0 | 0 | 1 | no  |
| 539 | LU | NA2 | 11 | <i>Chenopodium album</i> L.                                     | A | Amaranthaceae  | 1 | 1 | 0 | 0 | 0 | 2 | yes |
| 540 | LU | NA2 | 12 | <i>Juncus bufonius</i> L.                                       | A | Juncaceae      | 0 | 1 | 0 | 0 | 0 | 1 | no  |
| 541 | LU | NA2 | 13 | <i>Galinsoga ciliata</i> (Raf.) S.F. Blake                      | A | Asteraceae     | 1 | 1 | 0 | 0 | 0 | 2 | yes |
| 542 | LU | PM  | 1  | <i>Viola arvensis</i> Murray                                    | A | Violaceae      | 0 | 1 | 0 | 0 | 0 | 1 | no  |
| 543 | LU | PM  | 2  | <i>Galinsoga ciliata</i> (Raf.) S.F. Blake                      | A | Asteraceae     | 1 | 1 | 0 | 0 | 0 | 2 | yes |
| 544 | LU | PM  | 3  | <i>Lamium purpureum</i> L.                                      | A | Lamiaceae      | 0 | 0 | 0 | 0 | 0 | 0 | no  |
| 545 | LU | PM  | 4  | <i>Chenopodium album</i> L.                                     | A | Amaranthaceae  | 0 | 1 | 0 | 0 | 0 | 1 | no  |
| 546 | LU | PM  | 5  | <i>Convolvulus arvensis</i> L.                                  | P | Convolvulaceae | 0 | 1 | 0 | 0 | 0 | 1 | no  |
| 547 | LU | PM  | 6  | <i>Galinsoga ciliata</i> (Raf.) S.F. Blake                      | A | Asteraceae     | 0 | 0 | 0 | 0 | 0 | 0 | no  |
| 548 | LU | PM  | 7  | <i>Echinochloa crus-gali</i> (L.) P. Beauv.                     | A | Poaceae        | 0 | 1 | 0 | 0 | 0 | 1 | no  |
| 549 | LU | PM  | 8  | <i>Capsella bursa-pastoris</i> (L.) Medik                       | A | Brassicaceae   | 0 | 0 | 0 | 0 | 0 | 0 | no  |

Table S2

|     |    |    |     |                                                                 |   |                 |   |   |   |   |   |   |     |
|-----|----|----|-----|-----------------------------------------------------------------|---|-----------------|---|---|---|---|---|---|-----|
| 550 | LU | PM | 9   | <i>Polygonum lapathifolium ssp. lapathifolium</i>               | A | Polygonaceae    | 0 | 0 | 0 | 0 | 0 | 0 | no  |
| 551 | LU | PM | 10  | <i>Plantago major</i> L.                                        | P | Plantaginaceae  | 0 | 0 | 0 | 0 | 0 | 0 | no  |
| 552 | LU | PM | 11  | <i>Myosotis arvensis</i> (L.) Hill.                             | A | Boraginaceae    | 1 | 1 | 0 | 0 | 0 | 2 | yes |
| 553 | LU | PM | 12  | <i>Equisetum arvense</i> L.                                     | P | Equisetaceae    | 0 | 1 | 0 | 0 | 1 | 2 | no  |
| 554 | LU | PM | 13  | <i>Capsella bursa-pastoris</i> (L.) Medik                       | A | Brassicaceae    | 1 | 1 | 0 | 0 | 0 | 2 | yes |
| 555 | LU | PM | 14  | <i>Galinsoga ciliata</i> (Raf.) S.F. Blake                      | A | Asteraceae      | 0 | 1 | 0 | 0 | 0 | 1 | no  |
| 556 | LU | PM | 15  | <i>Stellaria graminea</i>                                       | P | Caryophyllaceae | 0 | 1 | 0 | 0 | 0 | 1 | no  |
| 557 | LU | PM | 16  | <i>Viola arvensis</i> Murray                                    | A | Violaceae       | 0 | 1 | 0 | 0 | 0 | 1 | no  |
| 558 | LU | PM | 17  | <i>Echinochloa crus-gali</i> (L.) P. Beauv.                     | A | Poaceae         | 0 | 1 | 0 | 0 | 0 | 1 | no  |
| 559 | LU | PM | 18  | <i>Anagalis arvensis</i> L.                                     | A | Primulaceae     | 0 | 1 | 0 | 0 | 0 | 1 | no  |
| 560 | LU | PM | 19  | <i>Galinsoga ciliata</i> (Raf.) S.F. Blake                      | A | Asteraceae      | 0 | 0 | 0 | 0 | 0 | 0 | no  |
| 561 | LU | PM | 21  | <i>Euphorbia helioscopia</i> L.                                 | A | Euphorbiaceae   | 0 | 1 | 0 | 0 | 0 | 1 | no  |
| 562 | LU | PM | 22  | <i>Matricaria maritima</i> L. subsp. <i>inodora</i> (L.) Dostal | P | Asteraceae      | 0 | 0 | 0 | 0 | 0 | 0 | no  |
| 563 | LU | PM | 23  | <i>Achillea millefolium</i> L.                                  | P | Asteraceae      | 1 | 1 | 1 | 1 | 1 | 5 | yes |
| 564 | LU | PM | 24  | <i>Galium verum</i> L.                                          | P | Rubiaceae       | 0 | 1 | 0 | 0 | 0 | 1 | no  |
| 565 | LU | PM | 25  | <i>Polygonum</i> sp.                                            | A | Polygonaceae    | 0 | 0 | 0 | 0 | 0 | 0 | no  |
| 566 | LU | PM | 26  | <i>Solanum tuberosum</i> L.                                     | P | Solanaceae      | 0 | 0 | 0 | 0 | 1 | 1 | no  |
| 567 | LU | PM | 27  | <i>Polygonum aviculare</i> L.                                   | A | Polygonaceae    | 0 | 0 | 0 | 0 | 0 | 0 | no  |
| 568 | LU | PM | 28  | <i>Vicia cracca</i> L.                                          | P | Fabaceae        | 0 | 1 | 0 | 0 | 0 | 1 | no  |
| 569 | LU | PM | 29  | <i>Polygonum persicaria</i> L.                                  | A | Polygonaceae    | 0 | 0 | 0 | 0 | 0 | 0 | no  |
| 570 | LU | PM | 13a | <i>Capsella bursa-pastoris</i> (L.) Medik                       | A | Brassicaceae    | 1 | 1 | 0 | 0 | 0 | 2 | yes |
| 571 | LU | S  | 1   | <i>Achillea millefolium</i> L.                                  | P | Asteraceae      | 0 | 1 | 0 | 0 | 0 | 1 | no  |
| 572 | LU | S  | 2   | <i>Convolvulus arvensis</i> L.                                  | P | Convolvulaceae  | 0 | 1 | 0 | 0 | 0 | 1 | no  |
| 573 | LU | S  | 3   | <i>Potentilla anserina</i> L.                                   | P | Rosaceae        | 0 | 1 | 0 | 0 | 0 | 1 | no  |
| 574 | LU | S  | 4   | <i>Elymus repens</i> (L.) Gould                                 | P | Poaceae         | 0 | 0 | 0 | 0 | 0 | 0 | no  |
| 575 | LU | S  | 5   | <i>Cirsium arvense</i> (L.) Scop.                               | P | Asteraceae      | 0 | 0 | 0 | 0 | 0 | 0 | no  |
| 576 | LU | S  | 6   | <i>Vicia cracca</i> L.                                          | P | Fabaceae        | 0 | 1 | 0 | 0 | 1 | 2 | no  |
| 577 | LU | S  | 7   | <i>Armoracia rusticana</i> P. Gaertn. B. Mey & Schab.           | P | Brassicaceae    | 0 | 1 | 0 | 1 | 0 | 2 | no  |
| 578 | LU | S  | 8   | <i>Potentilla argentea</i> L. s. str.                           | P | Rosaceae        | 0 | 1 | 0 | 0 | 0 | 1 | no  |
| 579 | LU | S  | 9   | <i>Galium mollugo</i> L.                                        | P | Rubiaceae       | 0 | 0 | 0 | 0 | 0 | 0 | no  |
| 580 | LU | S  | 10  | <i>Alopecurus geniculatus</i> L.                                | A | Poaceae         | 0 | 1 | 0 | 0 | 0 | 1 | no  |
| 581 | LU | S  | 11  | <i>Teraxacum officinale</i> F.H. Wigg.                          | P | Asteraceae      | 1 | 1 | 0 | 0 | 0 | 2 | yes |
| 582 | LU | S  | 12  | <i>Matricaria maritima</i> L. subsp. <i>inodora</i> (L.) Dostal | P | Asteraceae      | 0 | 1 | 0 | 0 | 0 | 1 | no  |
| 583 | LU | SU | 1   | <i>Equisetum arvense</i> L.                                     | P | Equisetaceae    | 0 | 0 | 0 | 0 | 0 | 0 | no  |
| 584 | LU | SU | 2   | <i>Plantago major</i> L.                                        | P | Plantaginaceae  | 0 | 0 | 0 | 0 | 0 | 0 | no  |

Table S2

|     |    |    |    |                                             |   |                       |   |   |   |   |   |   |     |
|-----|----|----|----|---------------------------------------------|---|-----------------------|---|---|---|---|---|---|-----|
| 585 | LU | SU | 3  | <i>Polygonum persicaria</i> L.              | A | <i>Polygonaceae</i>   | 0 | 0 | 0 | 0 | 0 | 0 | no  |
| 586 | LU | SU | 4  | <i>Trifolium pratense</i> L.                | P | <i>Fabaceae</i>       | 1 | 0 | 0 | 0 | 0 | 1 | no  |
| 587 | LU | SU | 5  | <i>Galium mollugo</i> L.                    | P | <i>Rubiaceae</i>      | 1 | 0 | 0 | 0 | 0 | 1 | no  |
| 588 | LU | SU | 6  | <i>Veronica persica</i> Poir.               | A | <i>Plantaginaceae</i> | 0 | 1 | 0 | 0 | 0 | 1 | no  |
| 589 | LU | SU | 7  | <i>Polygonum persicaria</i> L.              | A | <i>Polygonaceae</i>   | 0 | 0 | 0 | 0 | 0 | 0 | no  |
| 590 | LU | SU | 8  | <i>Stachys palustris</i> L.                 | P | <i>Lamiaceae</i>      | 0 | 0 | 0 | 0 | 0 | 0 | no  |
| 591 | LU | SU | 9  | <i>Pimpinella saxifraga</i> L.              | P | <i>Apiaceae</i>       | 1 | 1 | 0 | 0 | 0 | 2 | yes |
| 592 | LU | SU | 10 | <i>Cirsium arvense</i> (L.) Scop.           | P | <i>Asteraceae</i>     | 0 | 0 | 0 | 0 | 0 | 0 | no  |
| 593 | LU | SU | 11 | <i>Galinsoga ciliata</i> (Raf.) S.F. Blake  | A | <i>Asteraceae</i>     | 1 | 0 | 0 | 0 | 0 | 1 | no  |
| 594 | LU | SU | 12 | <i>Echinochloa crus-gali</i> (L.) P. Beauv. | A | <i>Poaceae</i>        | 0 | 0 | 0 | 0 | 0 | 0 | no  |
| 595 | LU | SU | 13 | <i>Chenopodium album</i> L.                 | A | <i>Amaranthaceae</i>  | 0 | 0 | 0 | 0 | 0 | 0 | no  |
| 596 | LU | SU | 14 | <i>Convolvulus arvensis</i> L.              | P | <i>Convolvulaceae</i> | 0 | 0 | 0 | 0 | 0 | 0 | no  |
| 597 | LU | SU | 15 | <i>Myosotis arvensis</i> (L.) Hill.         | A | <i>Boraginaceae</i>   | 1 | 0 | 0 | 0 | 0 | 1 | no  |
| 598 | LU | SU | 16 | <i>Gnaphalium uliginosum</i> L.             | A | <i>Asteraceae</i>     | 1 | 0 | 0 | 0 | 0 | 1 | no  |
| 599 | LU | SU | 17 | <i>Equisetum arvense</i> L.                 | P | <i>Equisetaceae</i>   | 1 | 0 | 1 | 1 | 1 | 4 | no  |
| 600 | LU | SU | 18 | <i>Rorippa palustris</i> (L.) Besser        | P | <i>Brassicaceae</i>   | 0 | 0 | 0 | 0 | 0 | 0 | no  |
